# Supplementary material for: Stereoselective total synthesis of (−)-nupharamine utilizing an α-chlorosulfide and a sulfinimine for C–C bond formation
Source: Royal Society of Chemistry journal article supplement (doi:10.1039/c5ob01750e), 2015-10-14

### <sup>1</sup>H NMR SPECTRUM OF COMPOUND 9

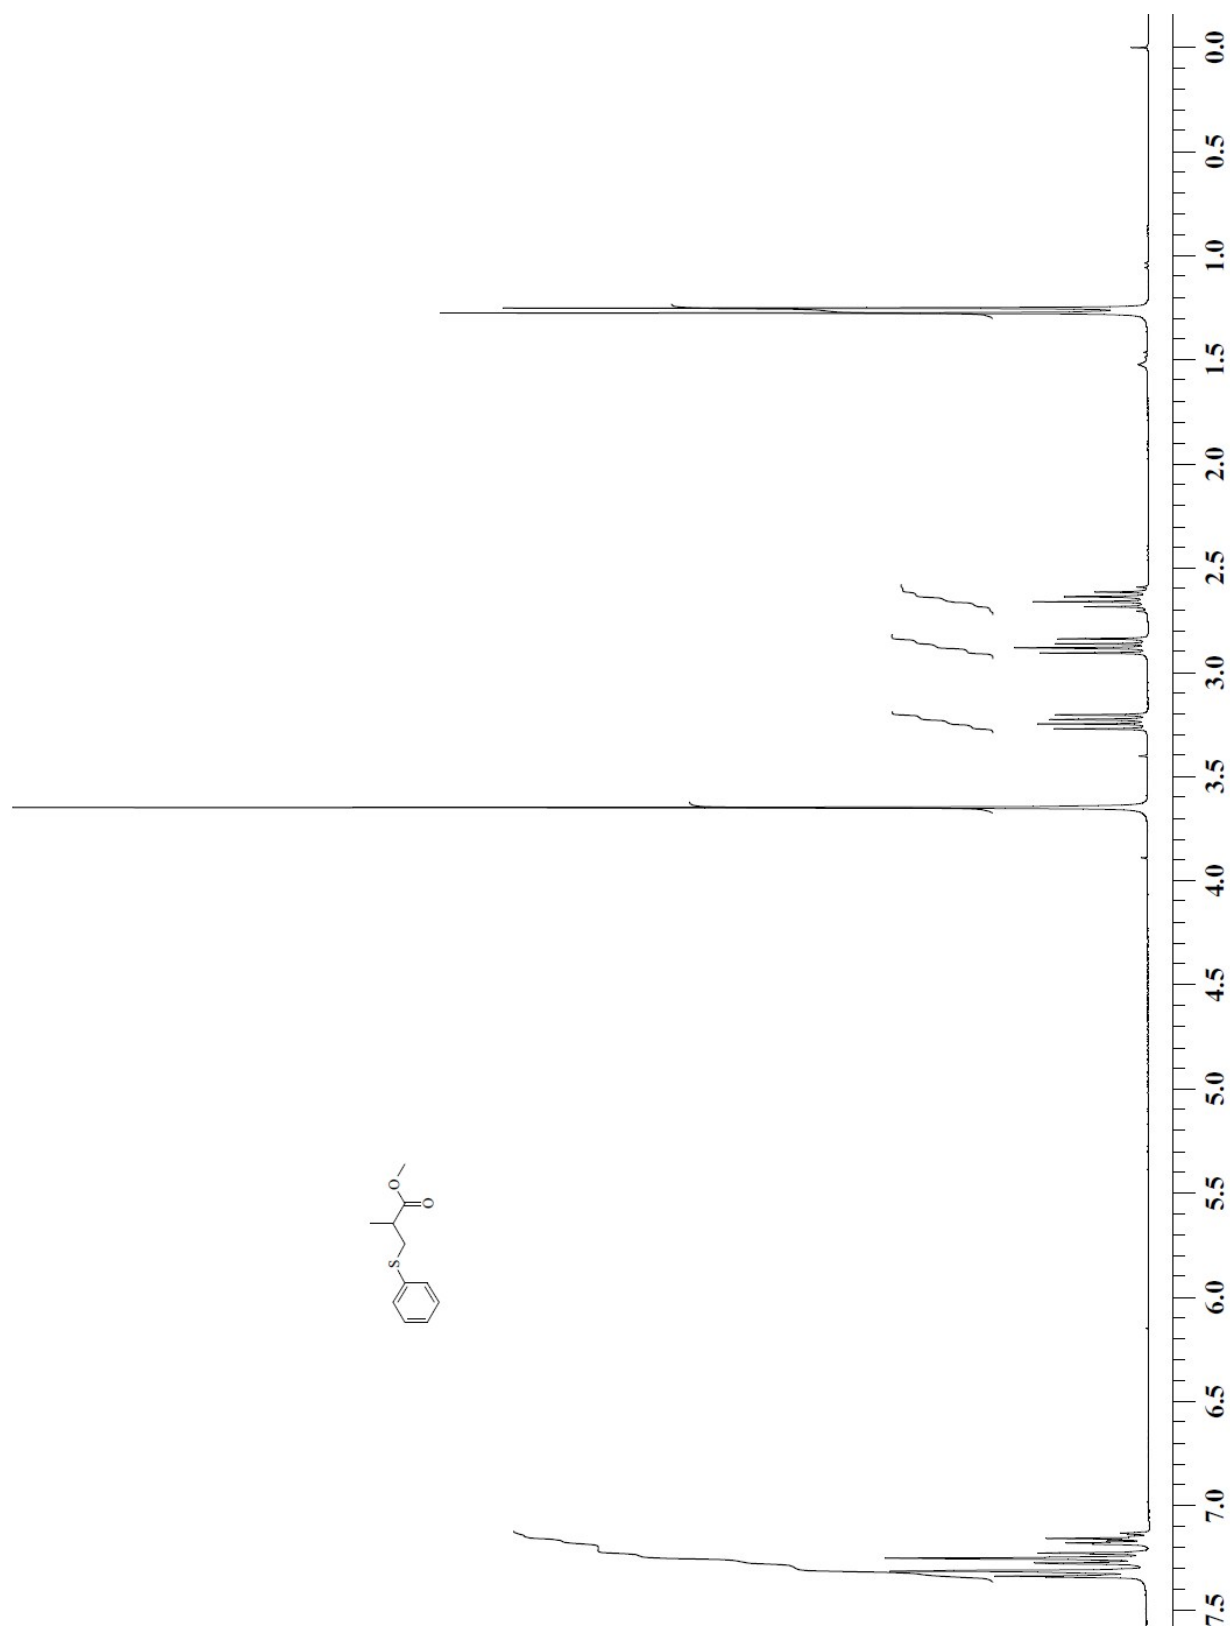

**<sup>13</sup>C NMR SPECTRUM OF COMPOUND 9**

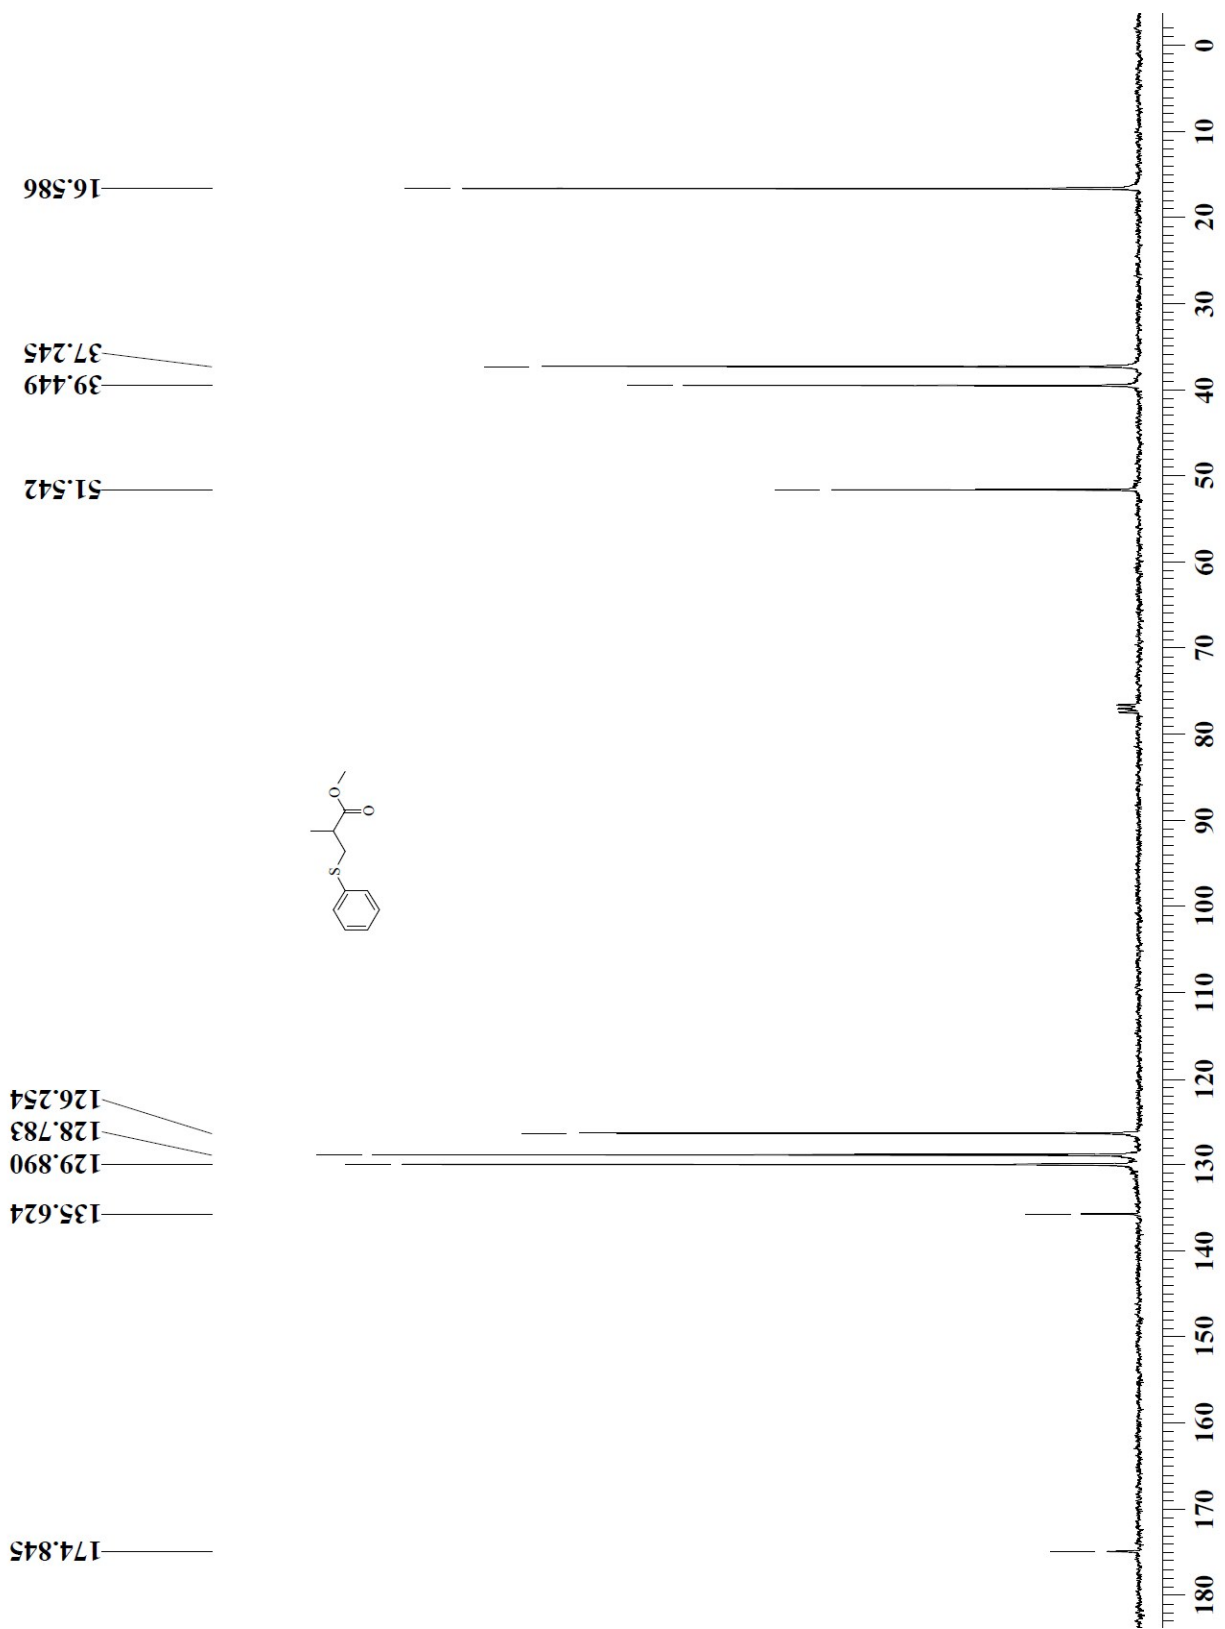

**<sup>1</sup>H NMR SPECTRUM OF COMPOUND 10**

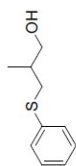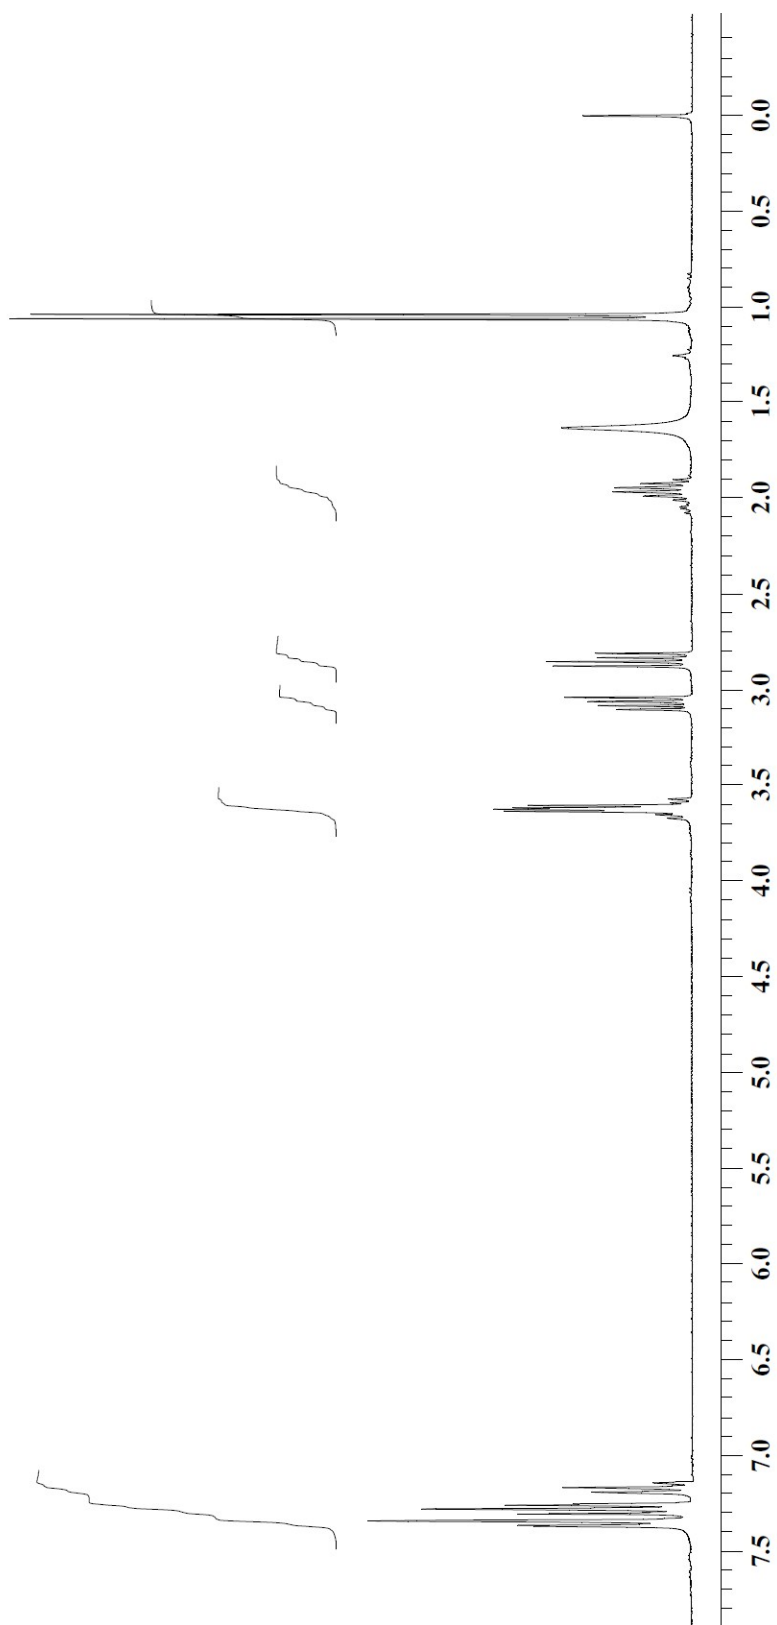

**<sup>13</sup>C NMR SPECTRUM OF COMPOUND 10**

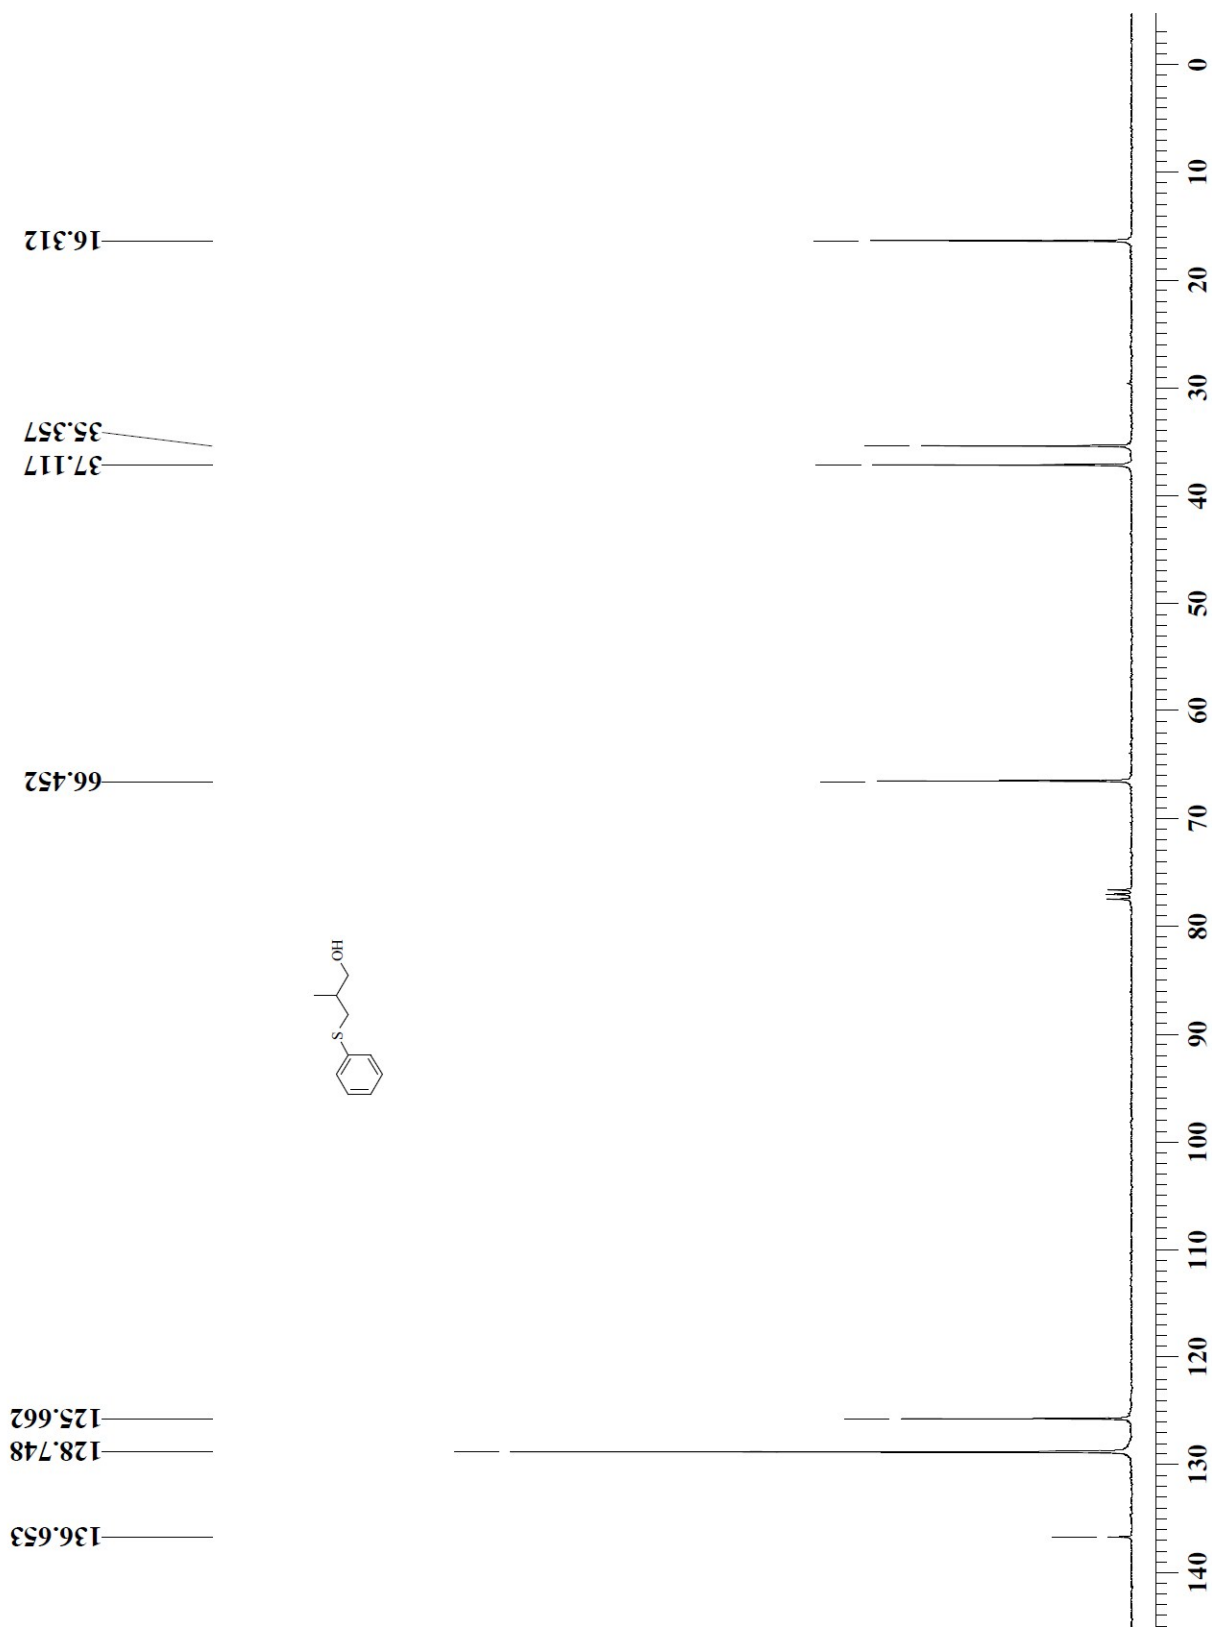

# HPLC OF THE RACEMIC COMPOUND 10

9/23/2015 13:27:54 1 / 1

## HPLC DATA REPORT (IICT - NPL)

Acquired by : Admin  
Sample Name : SRG-SR-OH-RACEMIC  
Sample ID : SRG-SR-OH-RACEMIC  
Vial # : 104  
Injection Volume : 3 uL  
Data File Name : 220915....2.lcd  
Method File Name : SRG-SR-Method.lcm  
Batch File Name :  
Report File Name : Report Format.lcr  
Data Acquired : 9/22/2015 3:15:22 PM  
Data Processed : 9/23/2015 1:27:17 PM  
Mobile Phase: 2% IPA in Hexane  
Column: Chiralpak IC (250mm X 4.6 mm 5 u)  
Flowrate: 1 mL/min

### <Chromatogram>

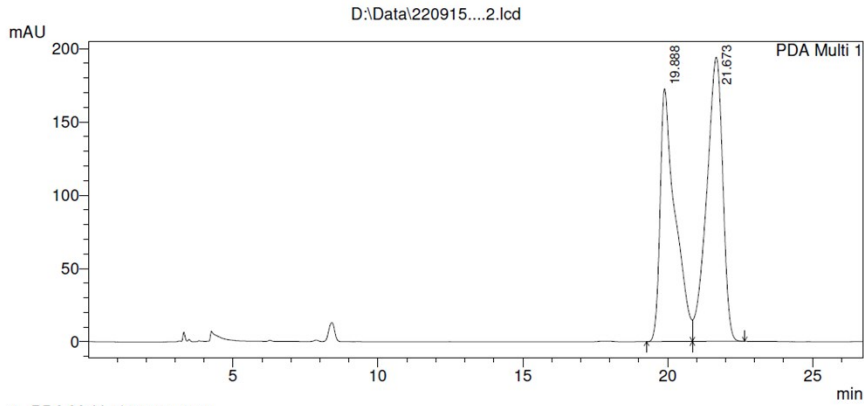

1 PDA Multi 1/210nm 4nm

PeakTable

PDA Ch1 210nm 4nm

| Peak# | Ret. Time | Area     | Height | Area %  | Height % |
|-------|-----------|----------|--------|---------|----------|
| 1     | 19.888    | 6216365  | 172602 | 45.339  | 47.087   |
| 2     | 21.673    | 7494459  | 193956 | 54.661  | 52.913   |
| Total |           | 13710824 | 366558 | 100.000 | 100.000  |

D:\Data\220915....2.lcd

# HPLC OF THE Optically pure 10

9/23/2015 13:39:40 1 / 1

## HPLC DATA REPORT (IICT - NPL)

Acquired by : Admin  
Sample Name : SRG-SR-OH-Chiral  
Sample ID : SRG-SR-OH-Chiral  
Vial # : 103  
Injection Volume : 5 uL  
Data File Name : 230915....4.lcd  
Method File Name : SRG-SR-Method.lcm  
Batch File Name :  
Report File Name : Report Format.lcr  
Data Acquired : 9/23/2015 12:51:21 PM  
Data Processed : 9/23/2015 1:38:57 PM  
Mobile Phase: 2% IPA in Hexane  
Column: Chiralpak IC (250mm X 4.6 mm, 5u)  
Flowrate: 1 mL/min

### <Chromatogram>

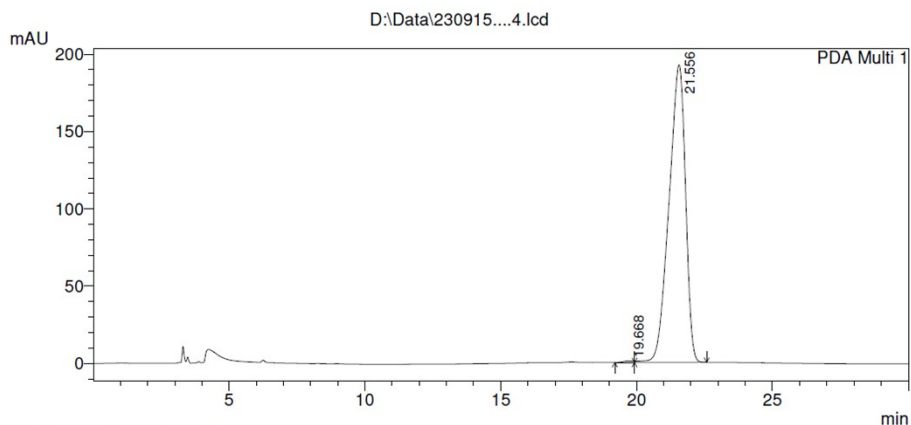

1 PDA Multi 1/210nm 4nm

PeakTable

| Peak# | Ret. Time | Area    | Height | Area %  | Height % |
|-------|-----------|---------|--------|---------|----------|
| 1     | 19.668    | 25713   | 987    | 0.315   | 0.510    |
| 2     | 21.556    | 8142975 | 192522 | 99.685  | 99.490   |
| Total |           | 8168688 | 193509 | 100.000 | 100.000  |

# <sup>1</sup>H NMR Spectrum of Mandalate Ester of Racemic Compound 10

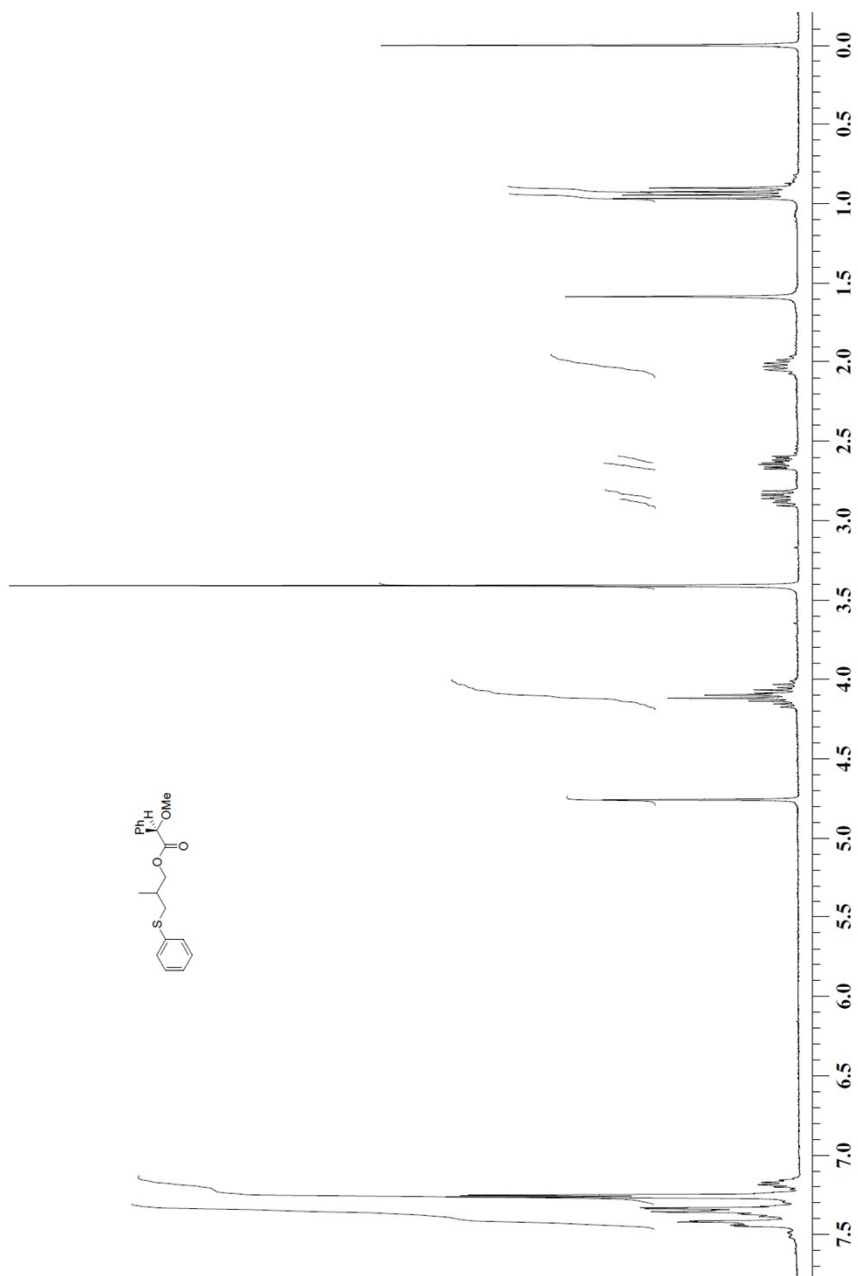

<sup>1</sup>H NMR (300 MHz, CDCl<sub>3</sub>):  $\delta$  7.46-7.40 (m, 4H), 7.39-7.31 (m, 6H), 7.28-7.22 (m, 8H), 7.21-7.14 (m, 2H), 4.76 (s, 2H), 4.15 (dd,  $J$  = 10.5, 5.2 Hz, 1H), 4.11\* (dd,  $J$  = 9.8, 5.2 Hz, 1H), 4.08 (dd,  $J$  = 10.5, 6.1 Hz, 1H), 4.04\* (dd,  $J$  = 9.8, 6.1 Hz, 1H), 3.41 (s, 6H), 2.88 (dd,  $J$  = 12.8, 6.1 Hz, 1H), 2.83\* (dd,  $J$  = 13.5, 6.1 Hz, 1H), 2.65 (dd,  $J$  = 13.5, 7.5 Hz, 1H), 2.61\* (dd,  $J$  = 12.8, 6.1 Hz, 1H), 2.08-1.95 (m, 2H), 0.95 (d,  $J$  = 6.7 Hz, 3H), 0.91\* (d,  $J$  = 6.7 Hz, 3H).

**<sup>1</sup>H NMR Spectrum of Mandalate Ester of Optically pure 10**

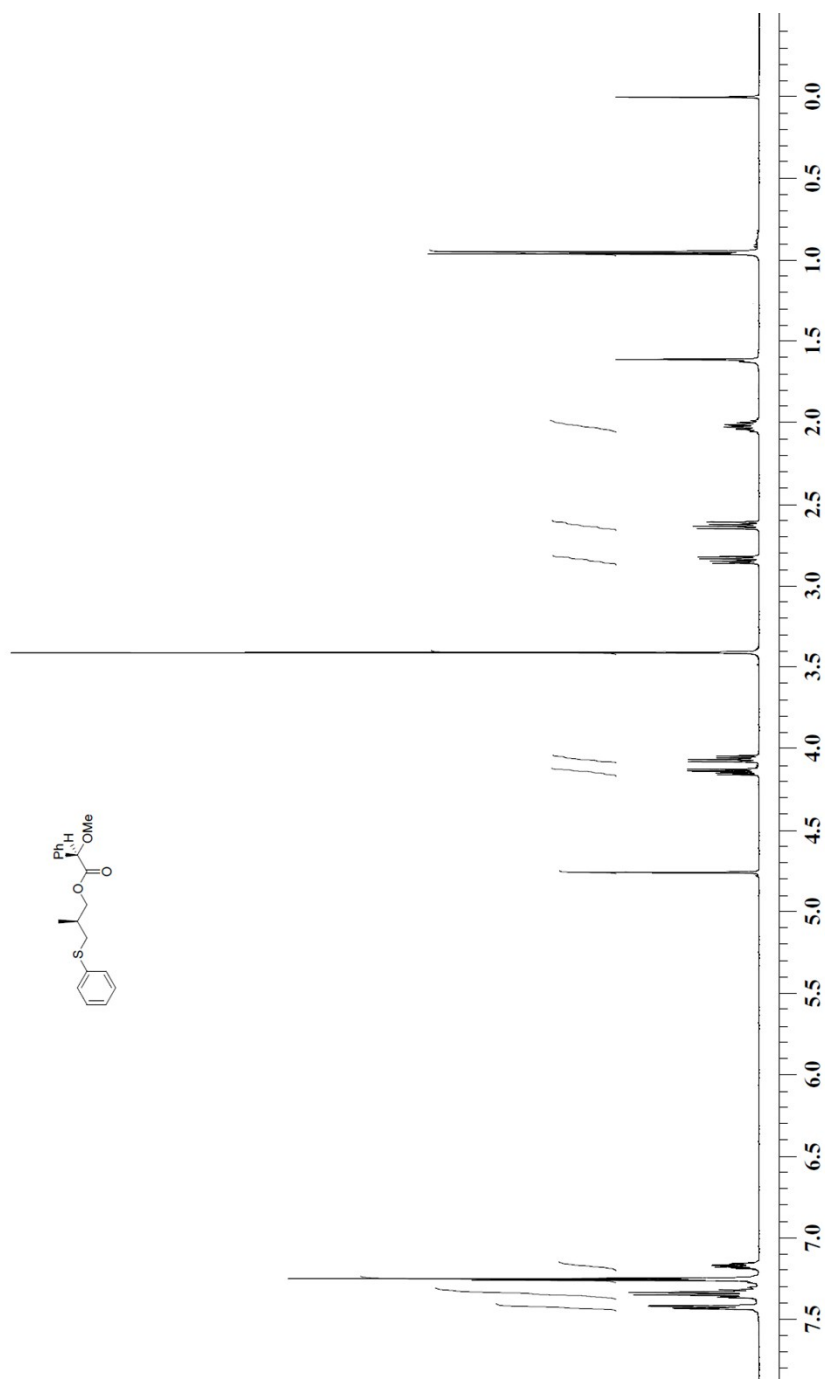

**<sup>1</sup>H NMR** (300 MHz, CDCl<sub>3</sub>): δ 7.44-7.41 (m, 2H), 7.37-7.31 (m, 3H), 7.27-7.22 (m, 4H), 7.19-7.15 (m, 1H), 4.76 (s, 1H), 4.14 (dd, *J* = 10.9, 5.5 Hz, 1H), 4.06 (dd, *J* = 10.9, 6.1 Hz, 1H), 3.41 (s, 3H), 2.84 (dd, *J* = 13.1, 6.1 Hz, 1H), 2.63 (dd, *J* = 13.1, 7.5 Hz, 1H), 2.05-1.95 (m, 1H), 0.95 (d, *J* = 6.8 Hz, 3H).



# <sup>1</sup>H NMR SPECTRUM OF COMPOUND 5

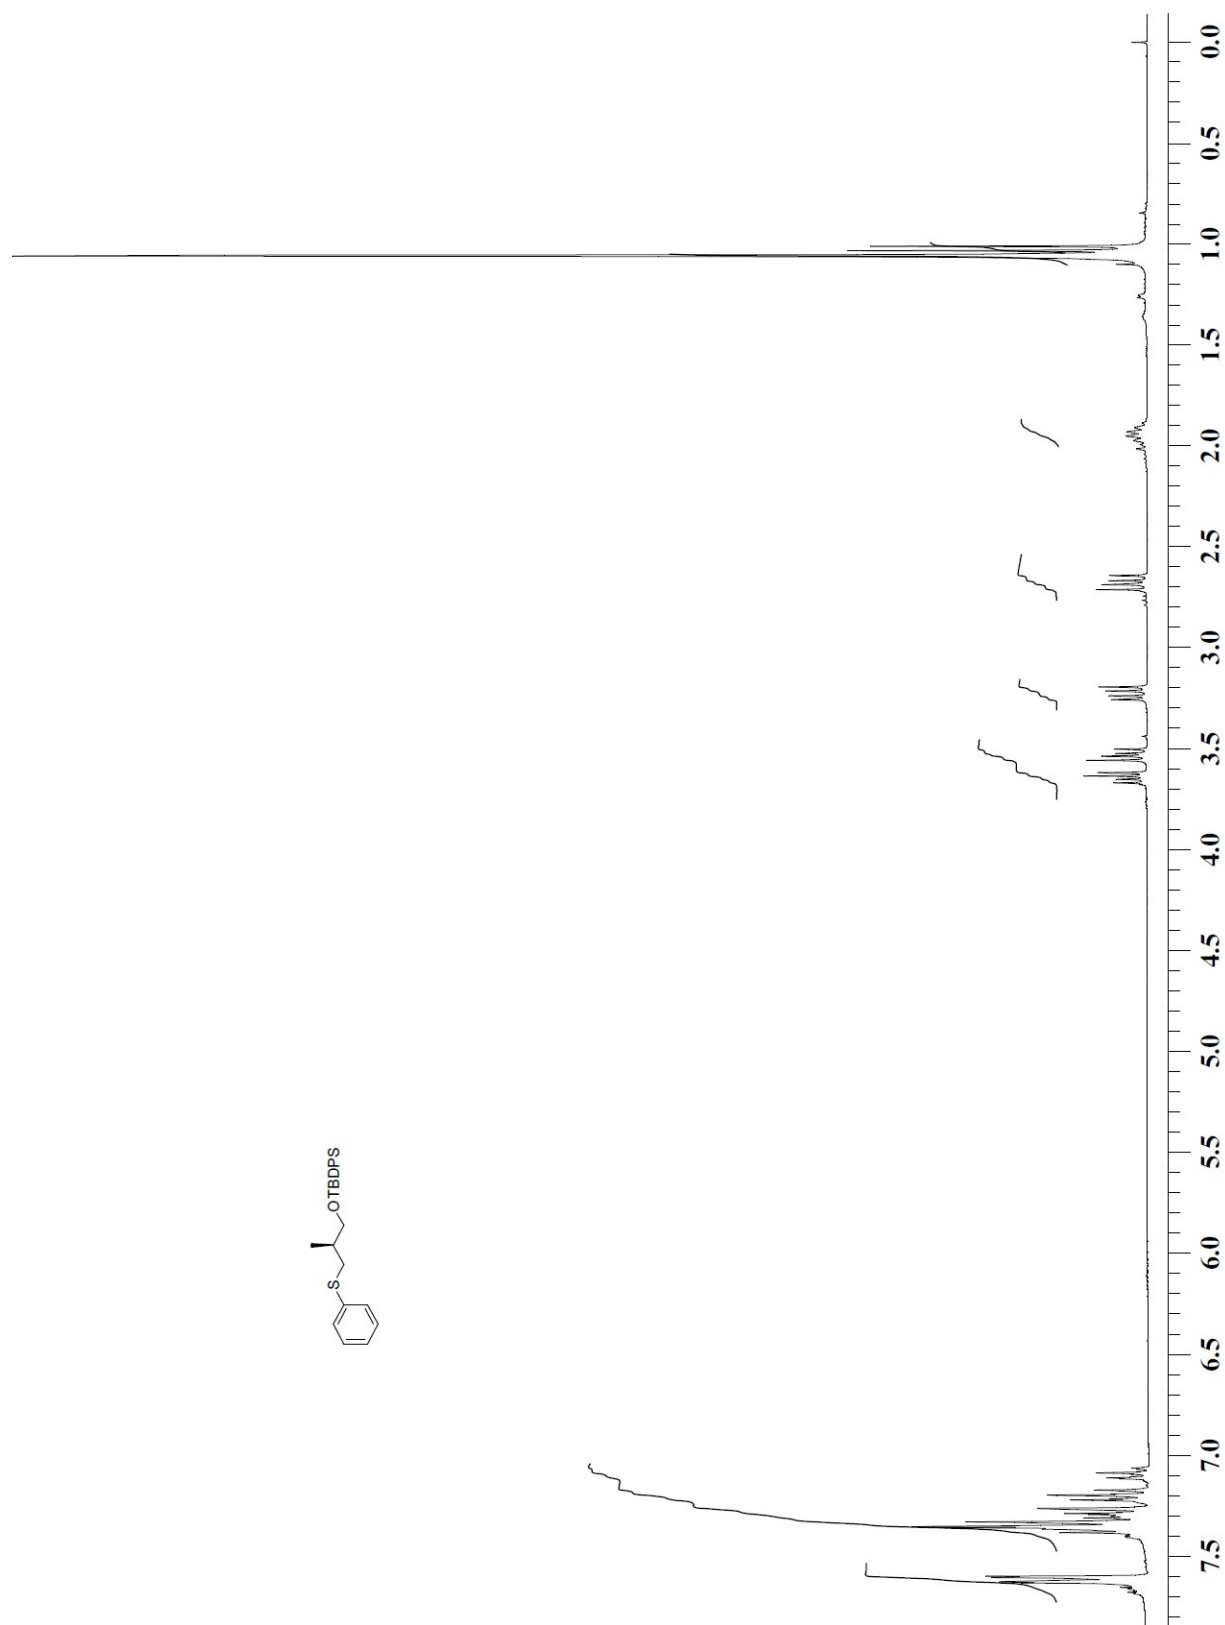

# <sup>13</sup>C NMR SPECTRUM OF COMPOUND 5

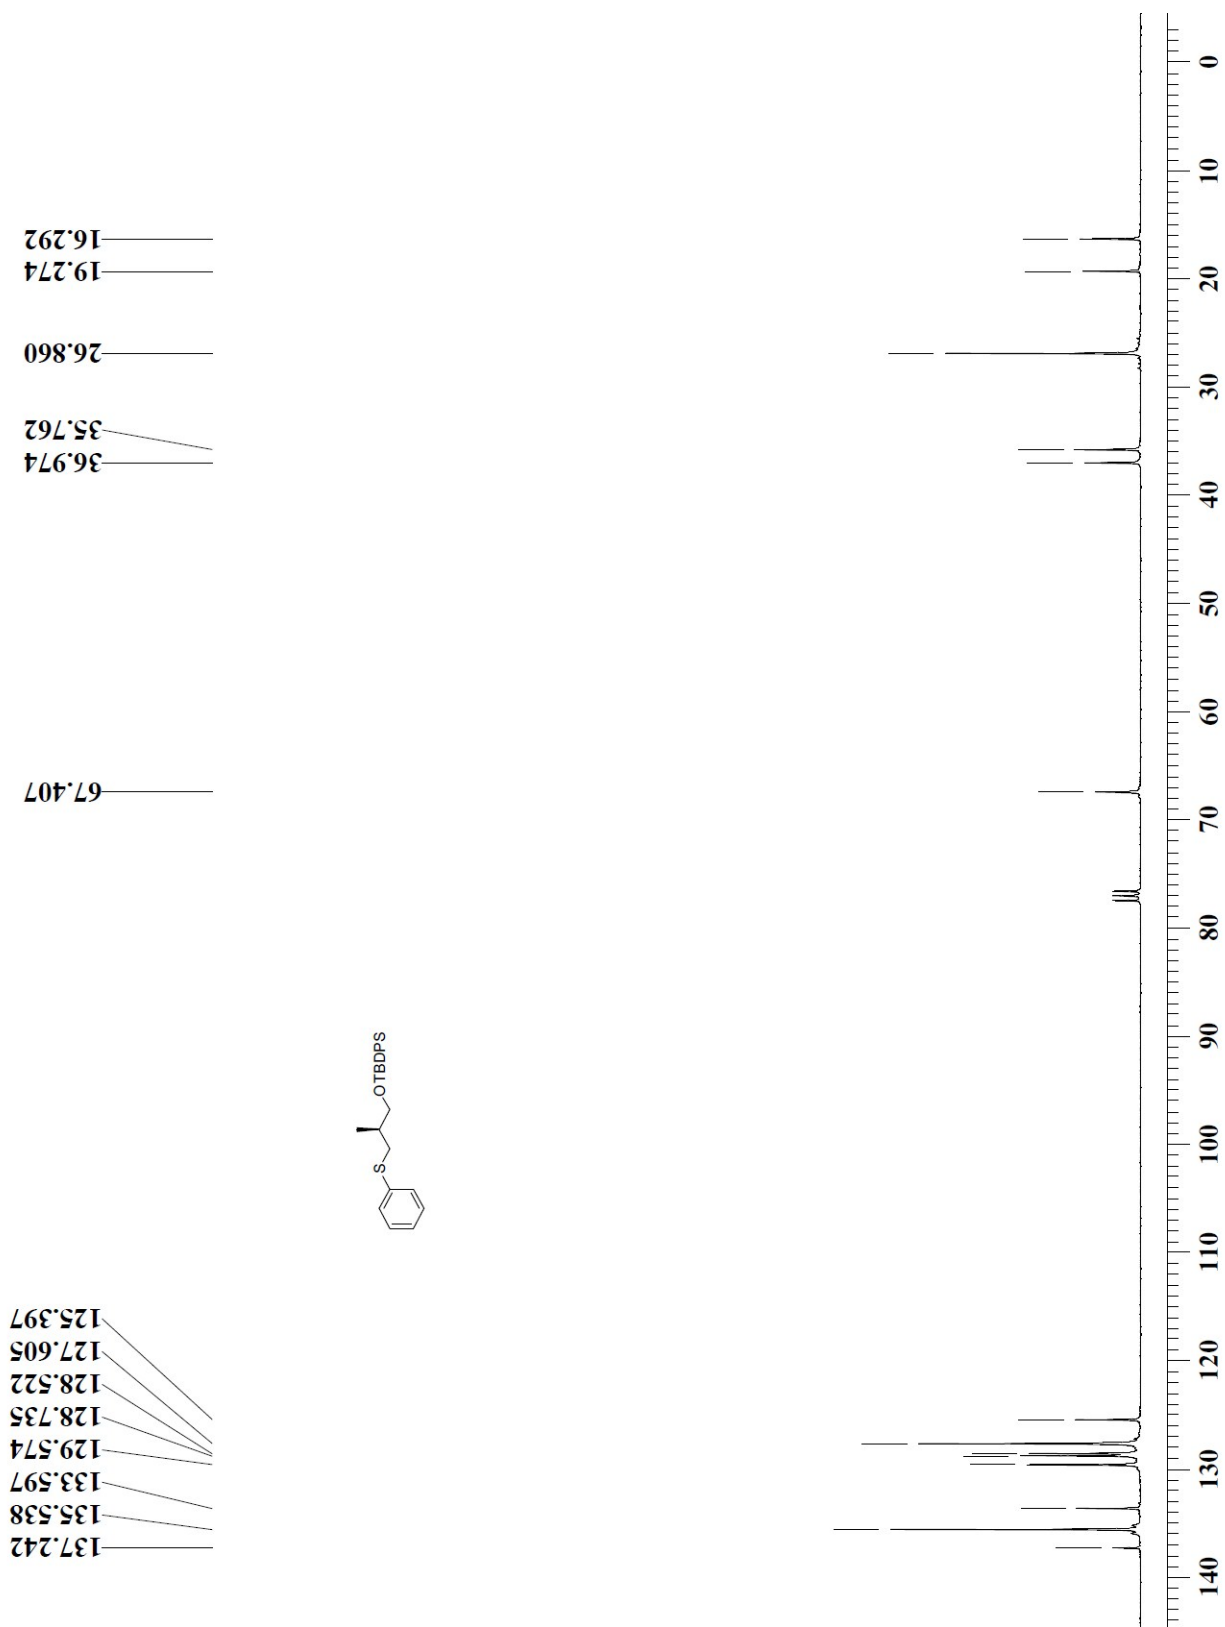



# <sup>13</sup>C NMR SPECTRUM OF COMPOUND 4

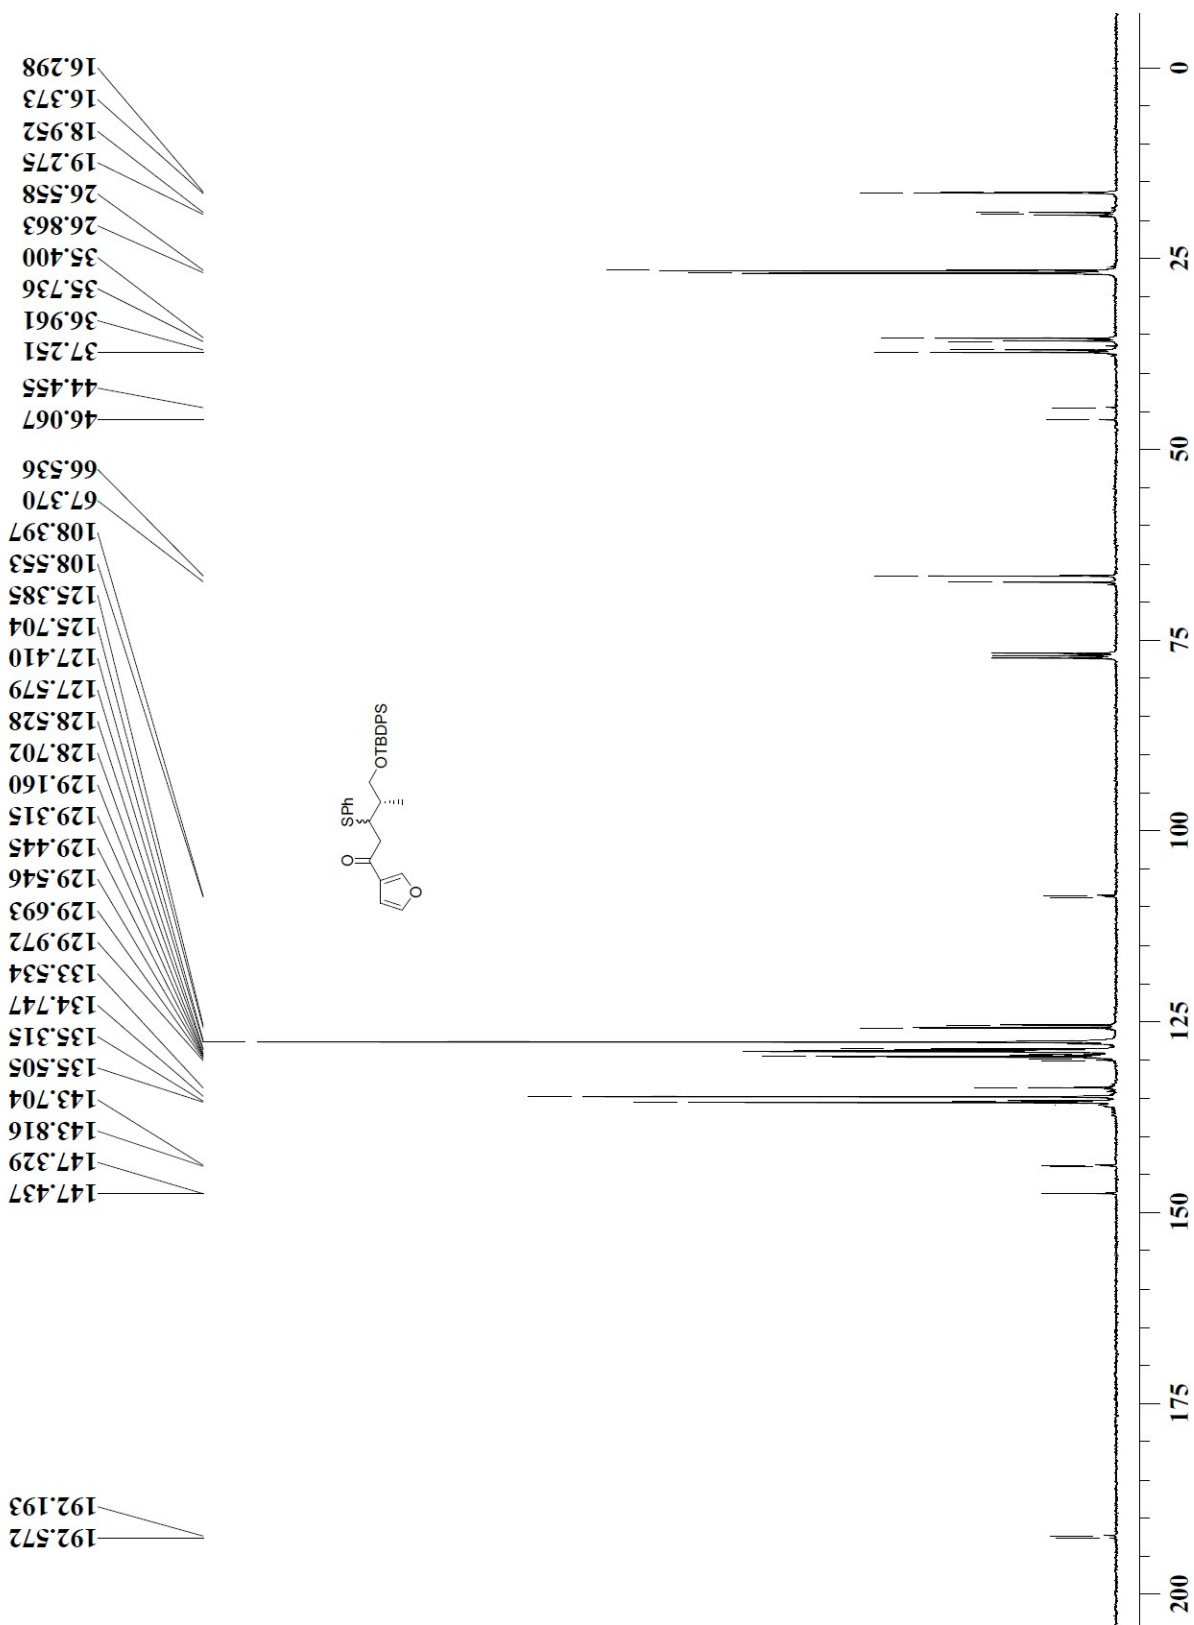

# <sup>1</sup>H NMR SPECTRUM OF COMPOUND 13

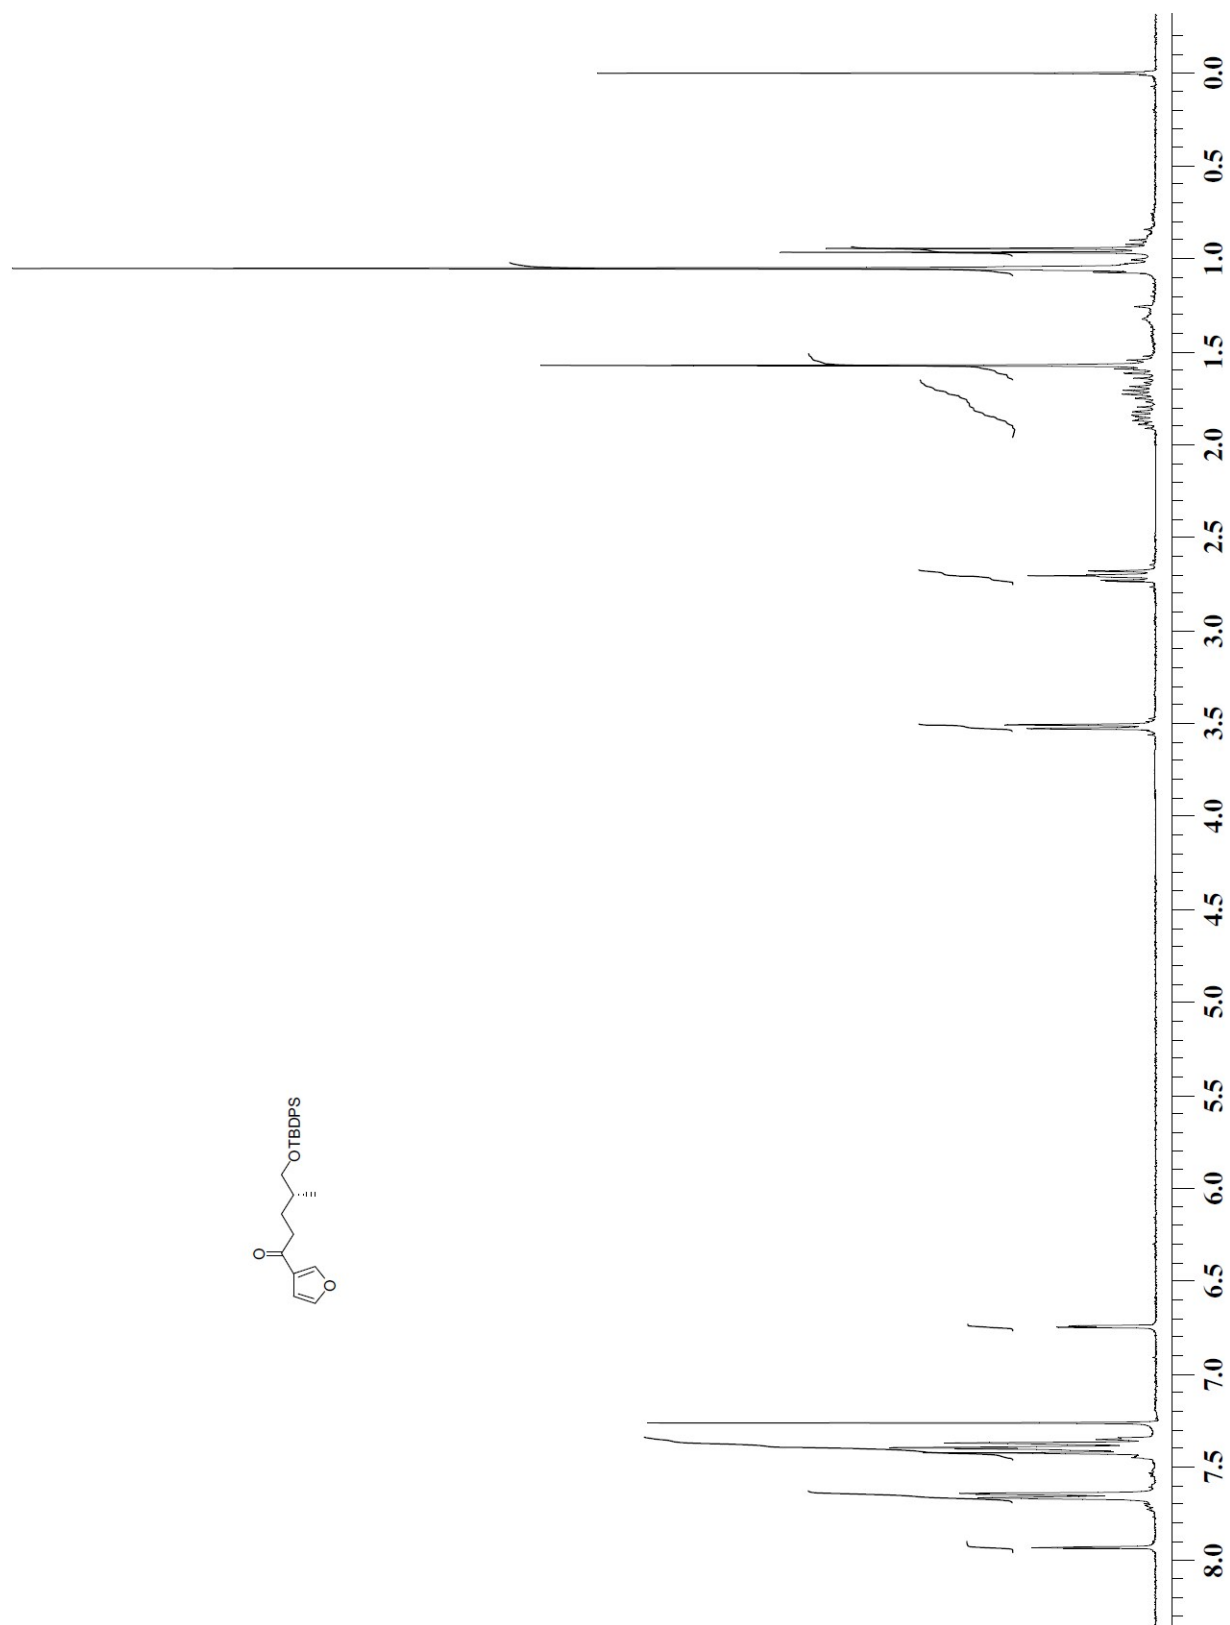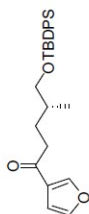

**<sup>13</sup>C NMR SPECTRUM OF COMPOUND 13**

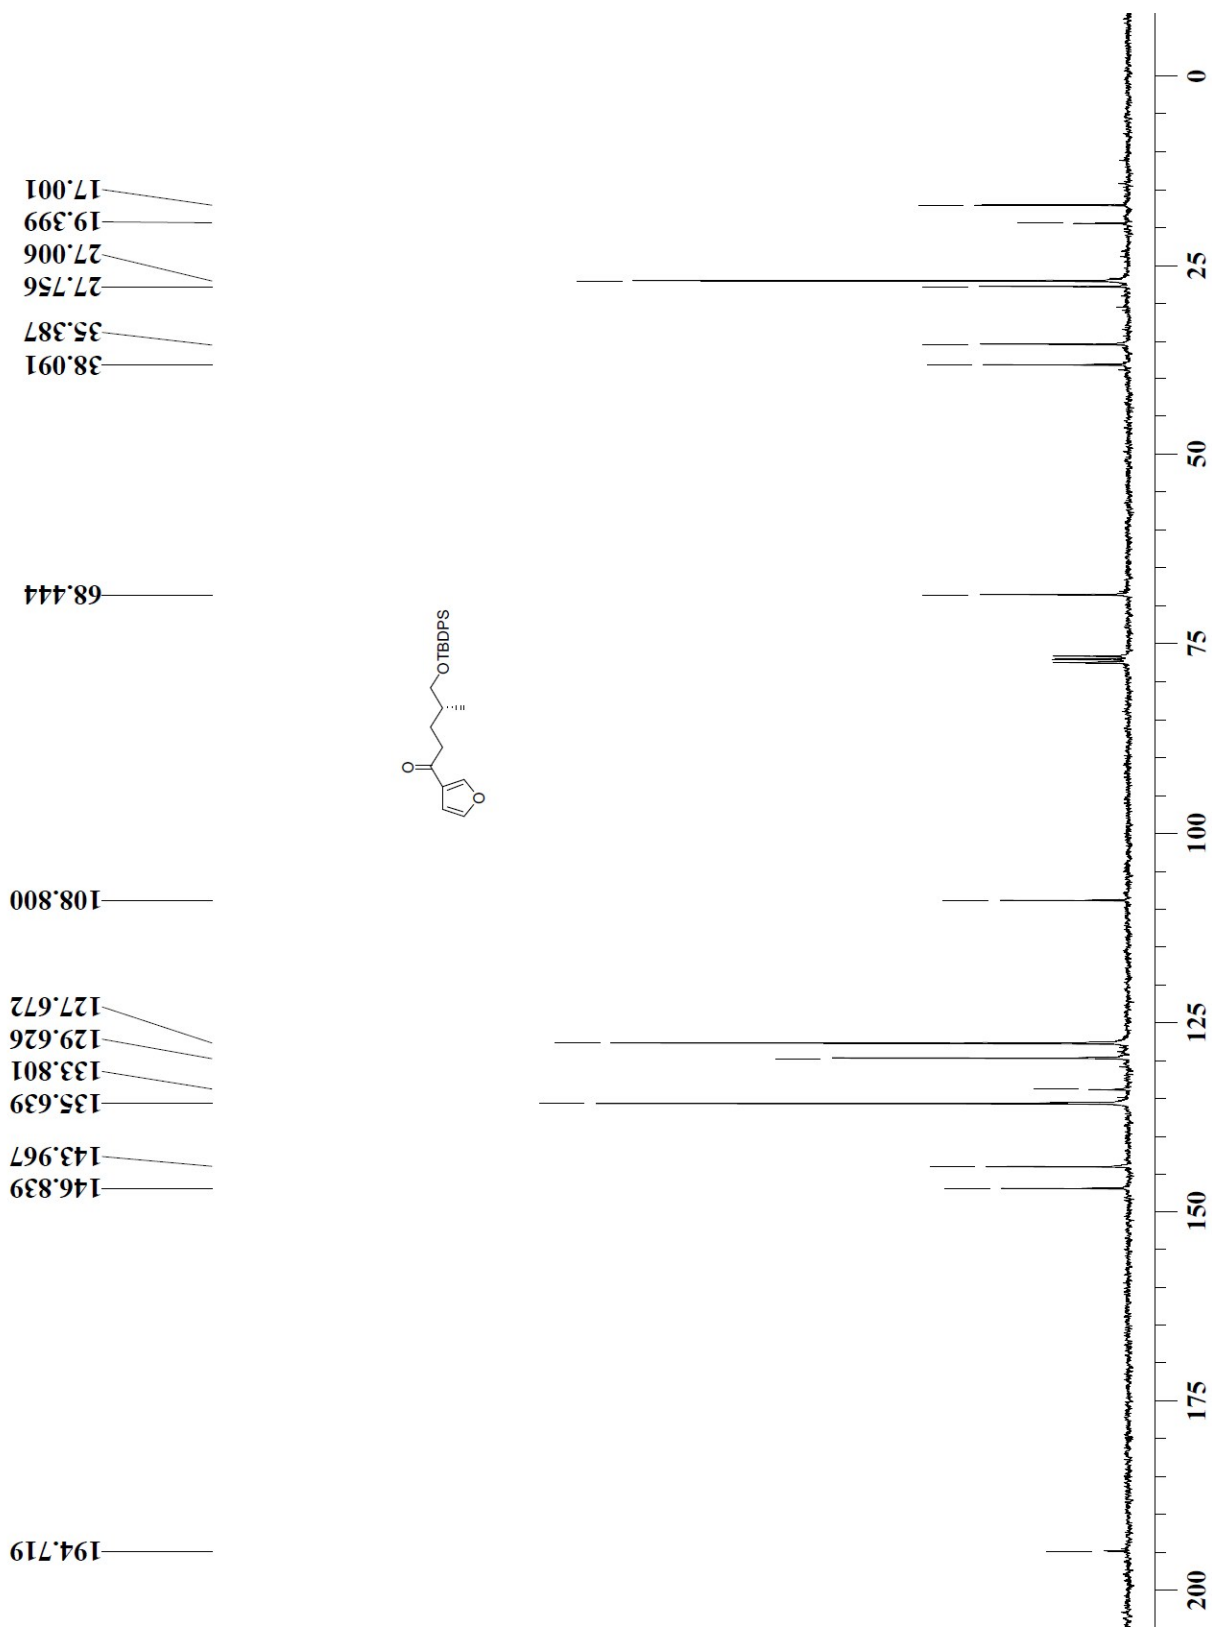

# <sup>1</sup>H NMR SPECTRUM OF COMPOUND 14

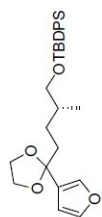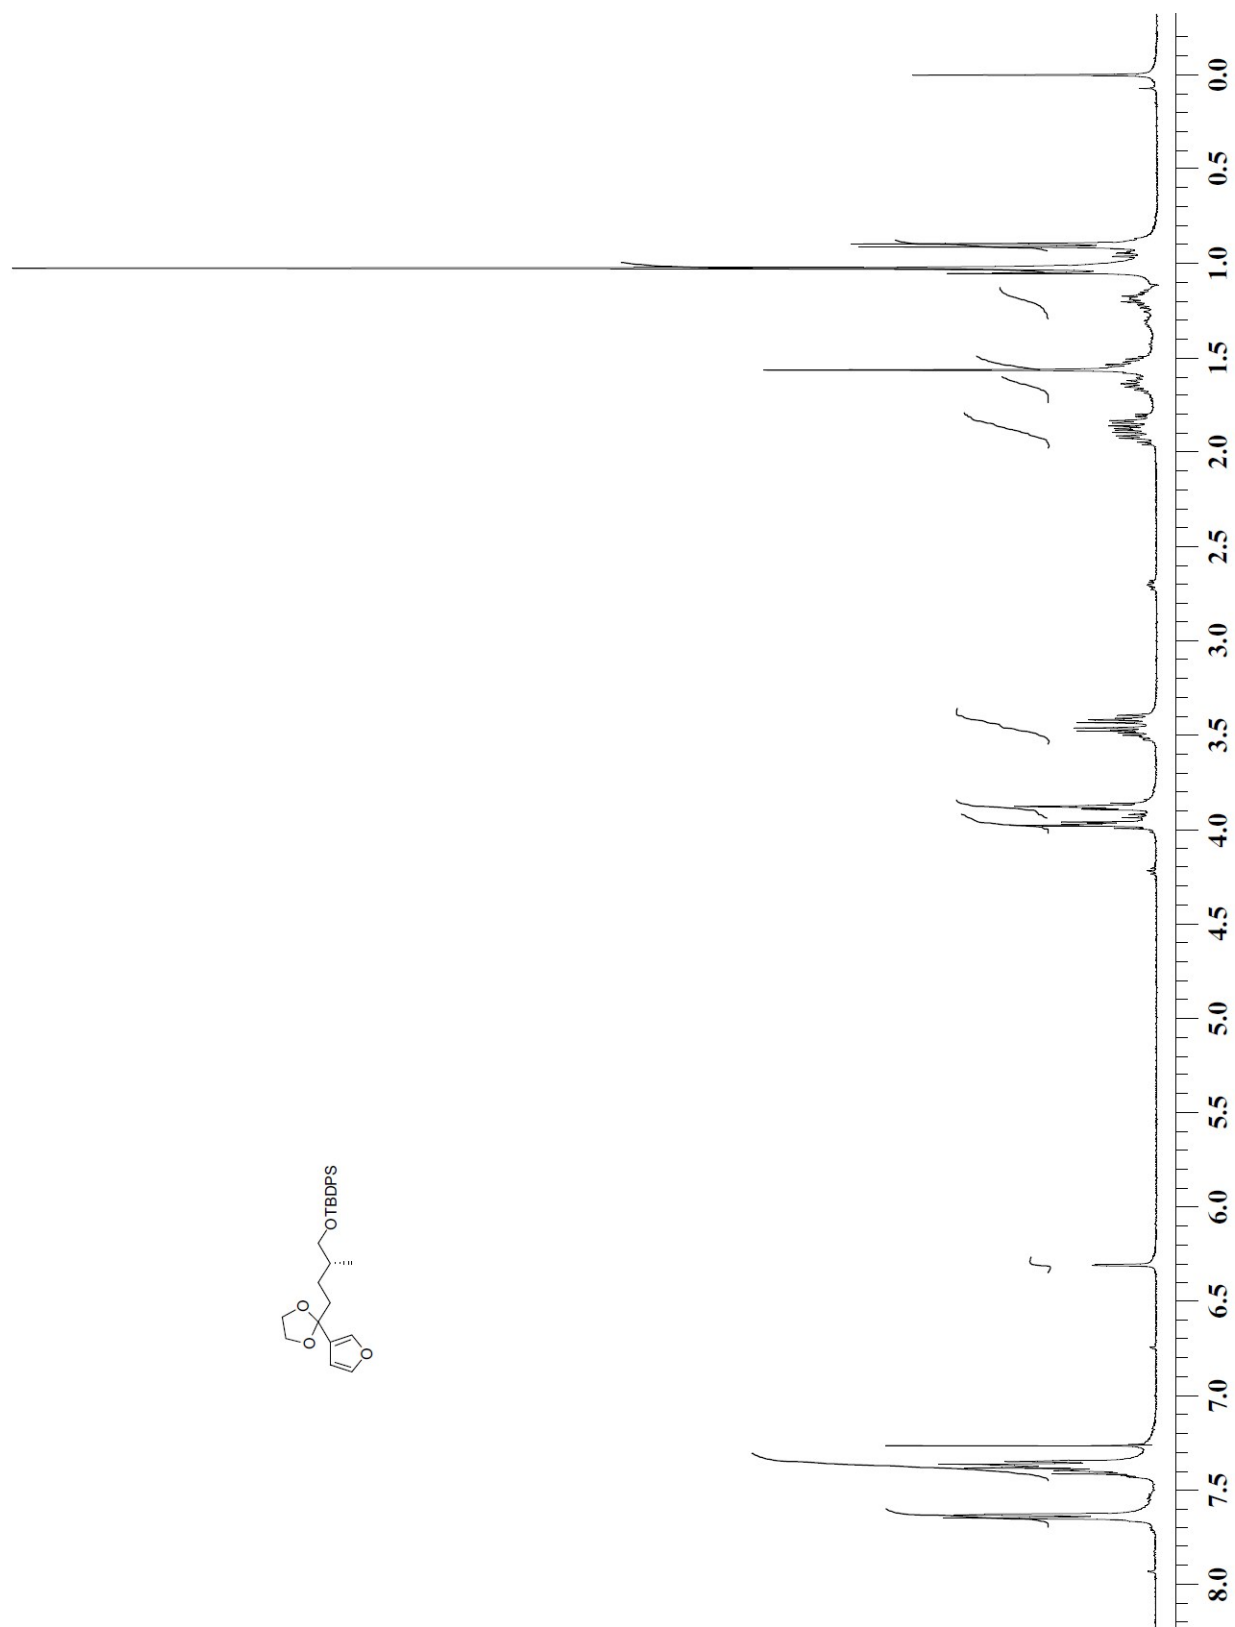

# <sup>13</sup>C NMR SPECTRUM OF COMPOUND 14

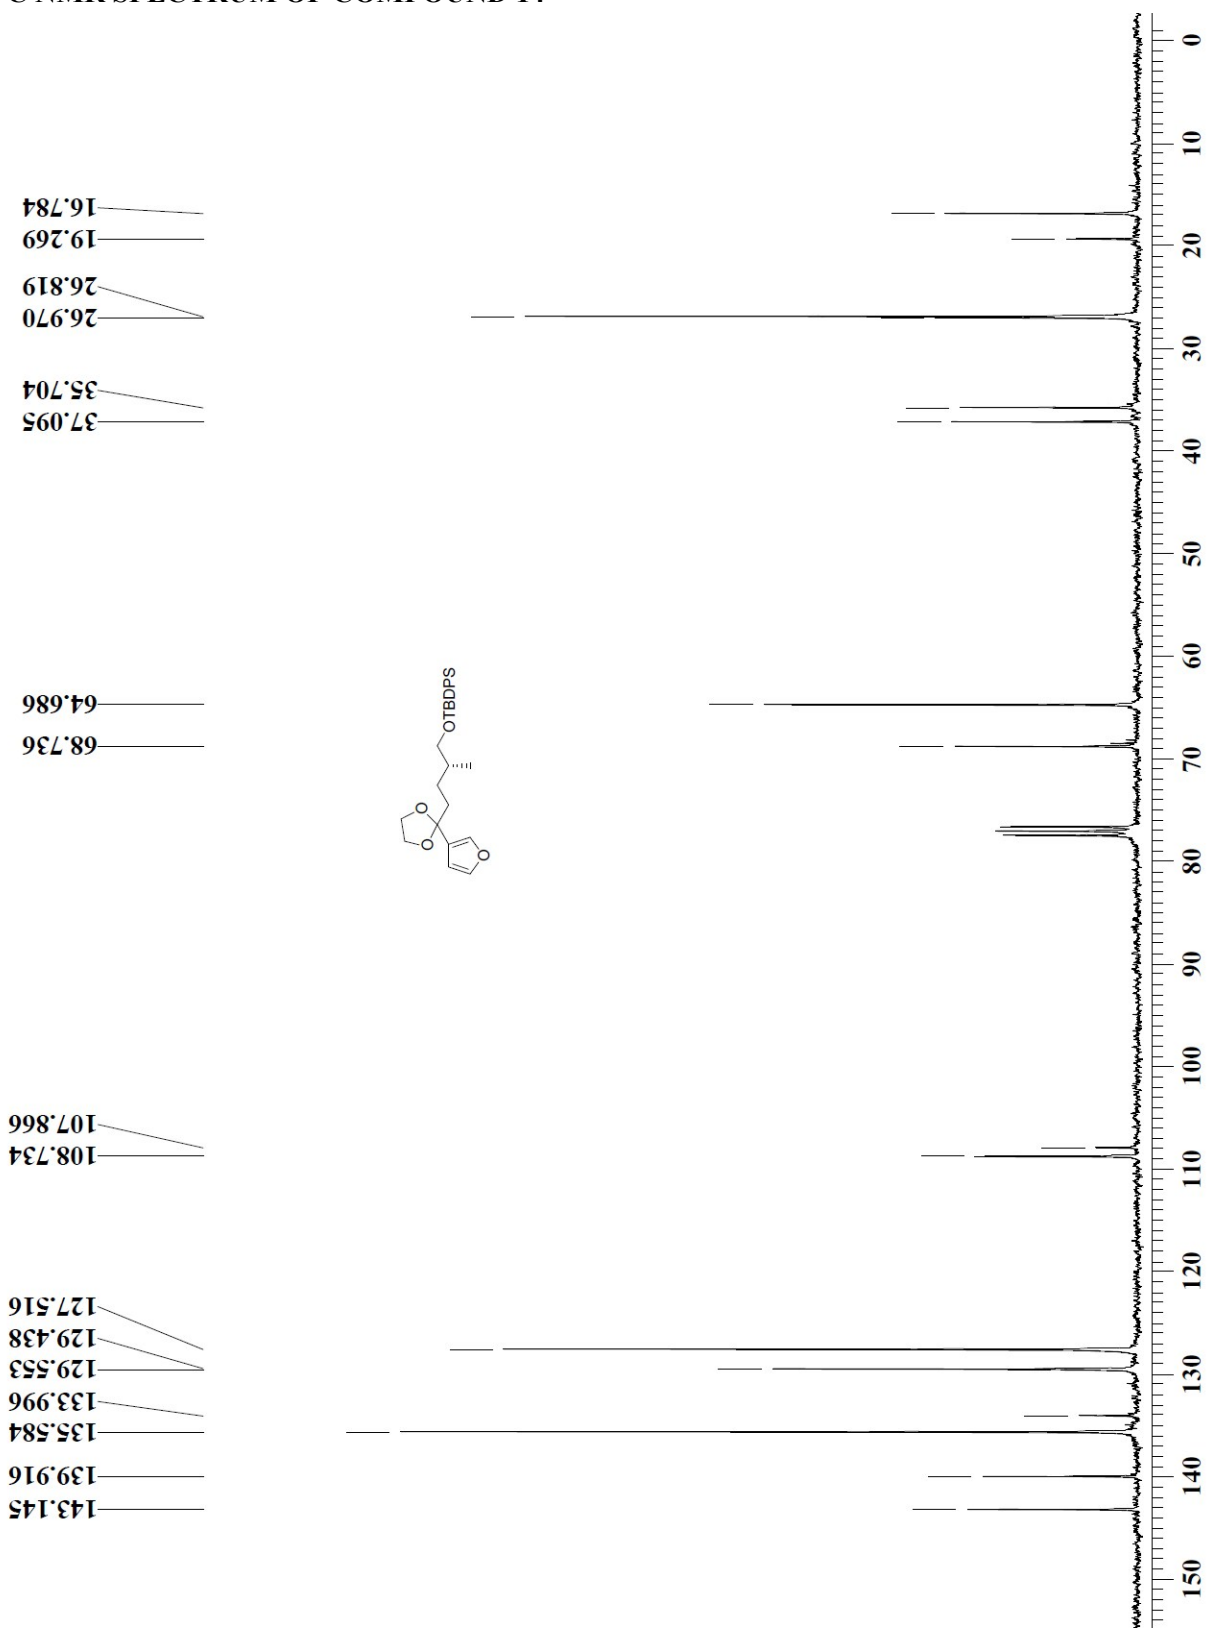



# <sup>1</sup>H NMR SPECTRUM OF COMPOUND 15

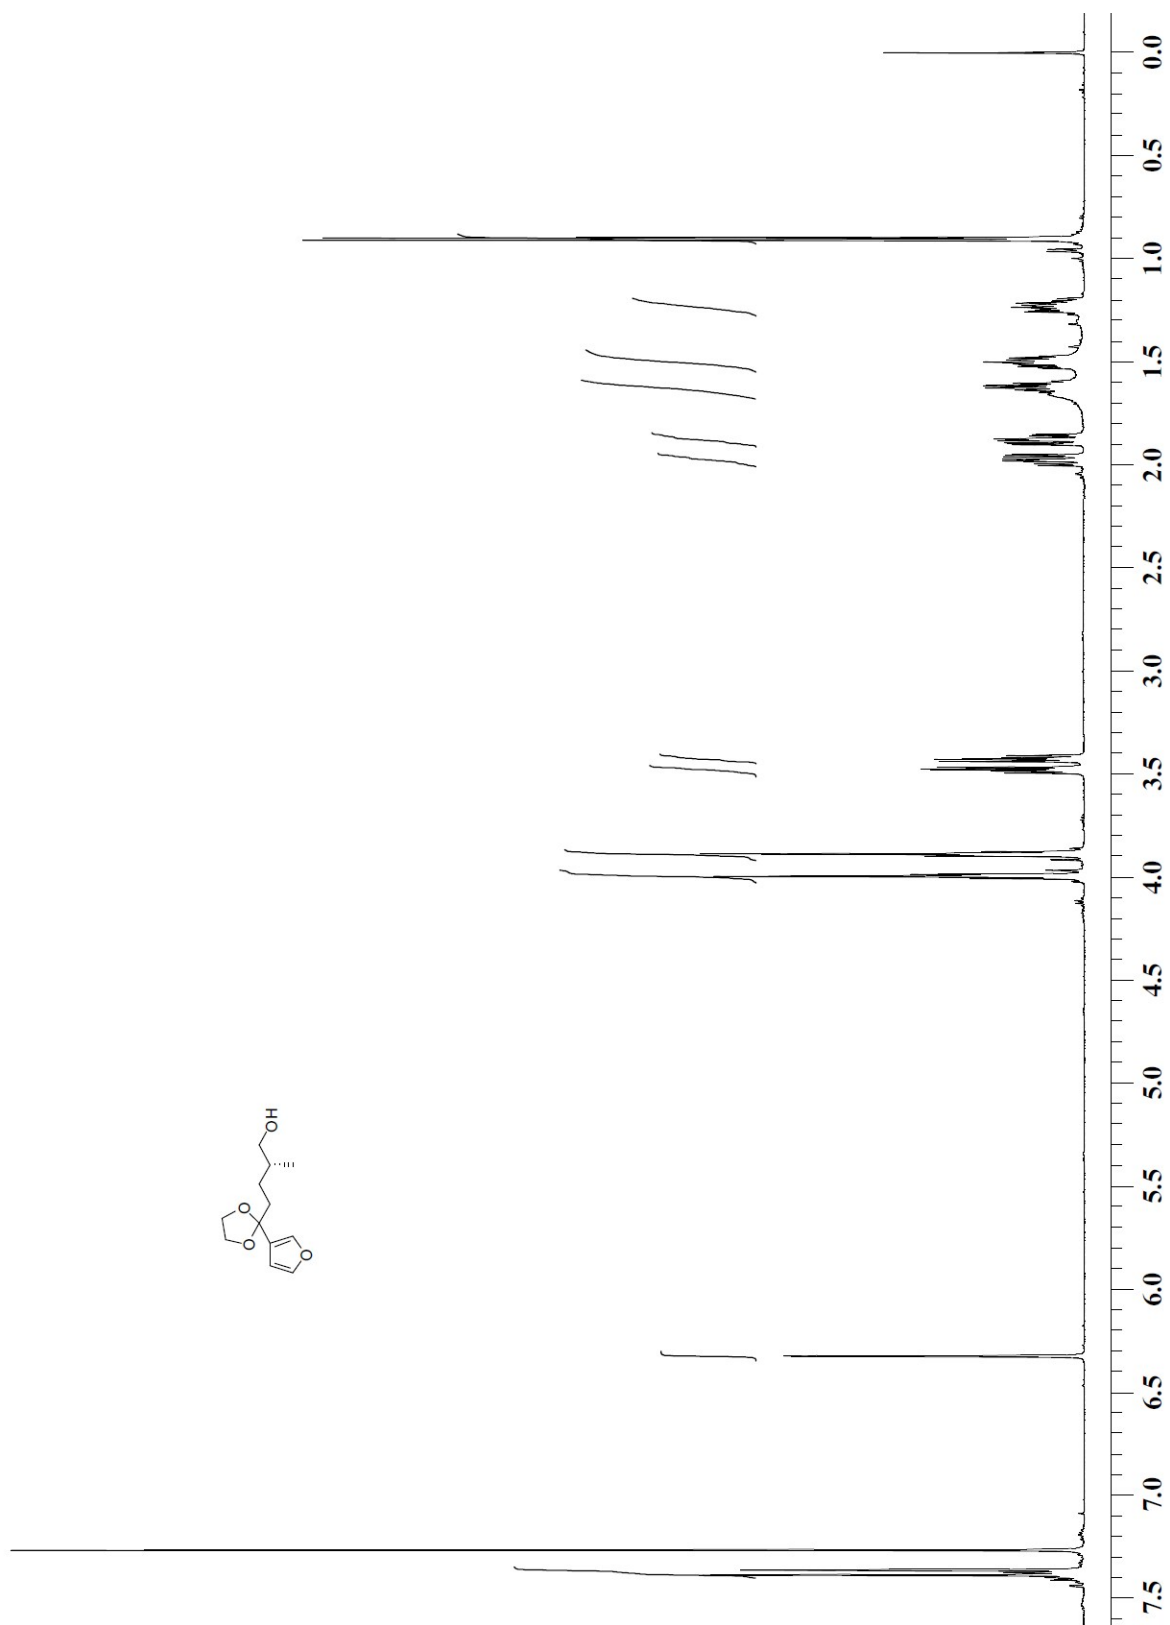

# <sup>13</sup>C NMR SPECTRUM OF COMPOUND 15

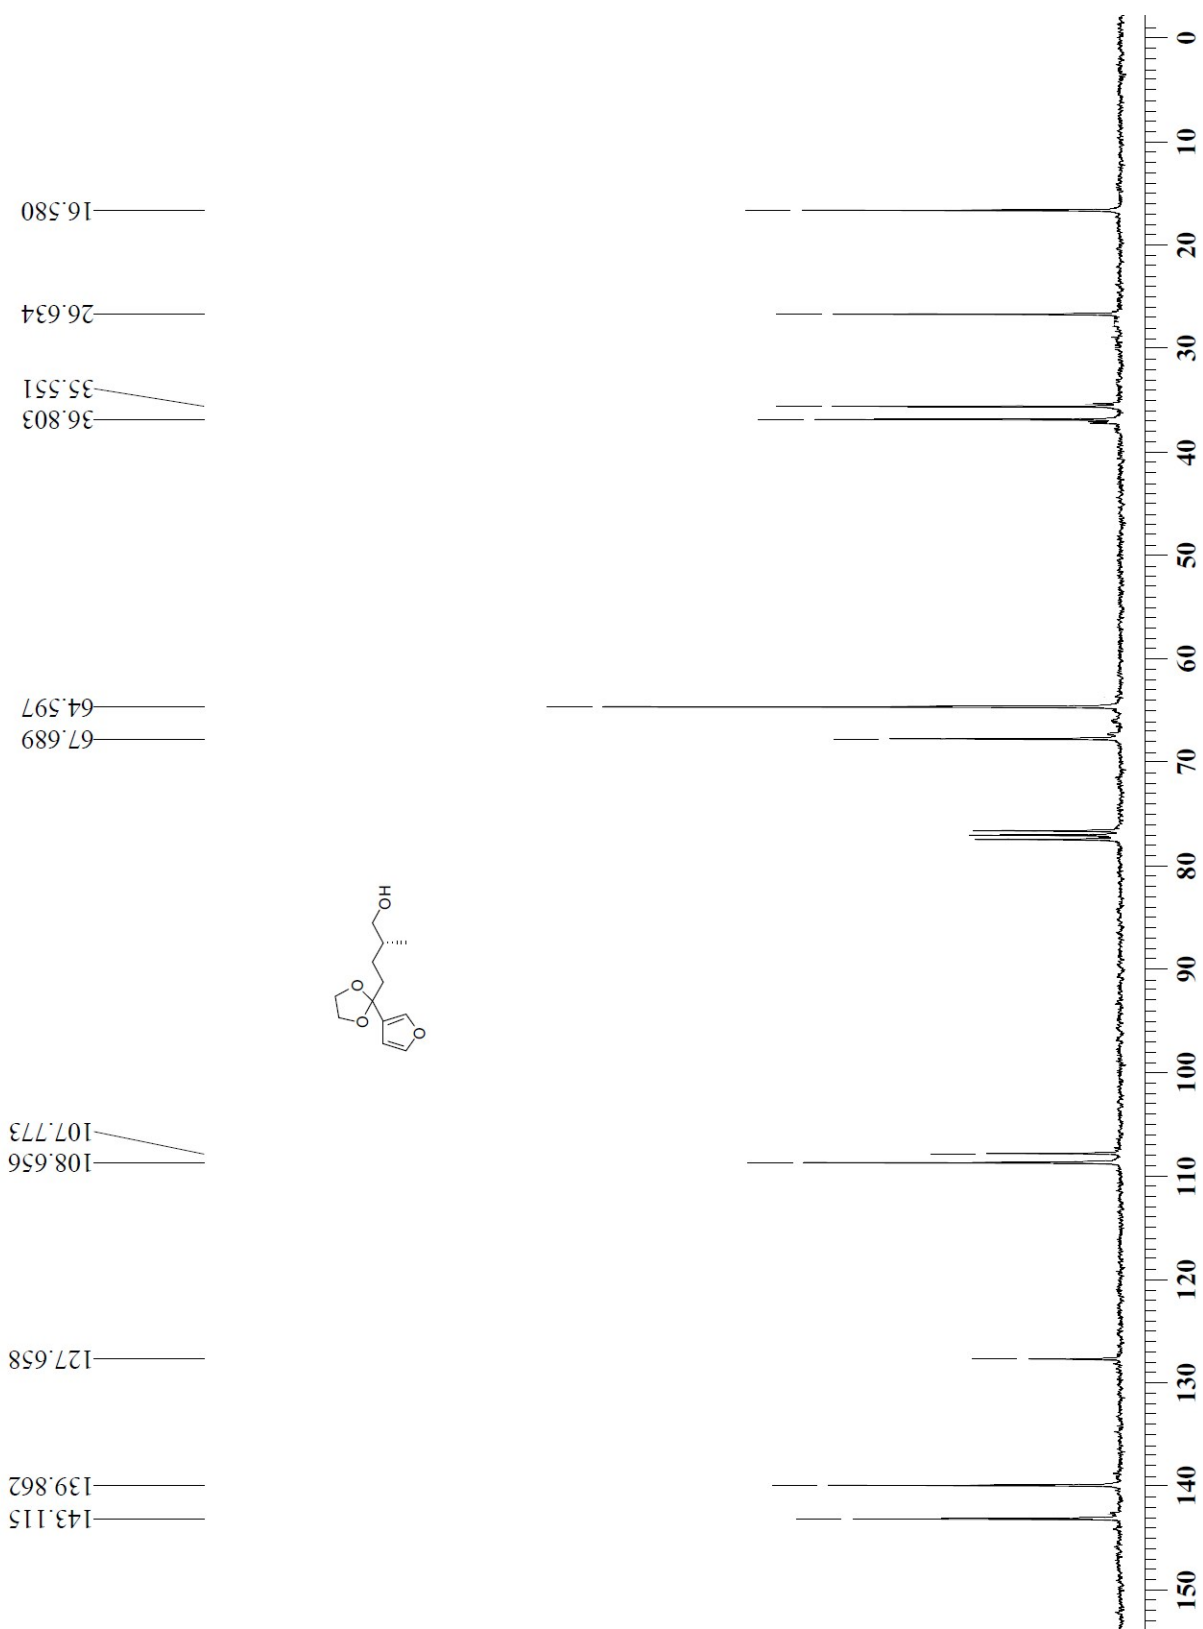

**<sup>1</sup>H NMR SPECTRUM OF COMPOUND 16**

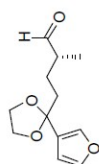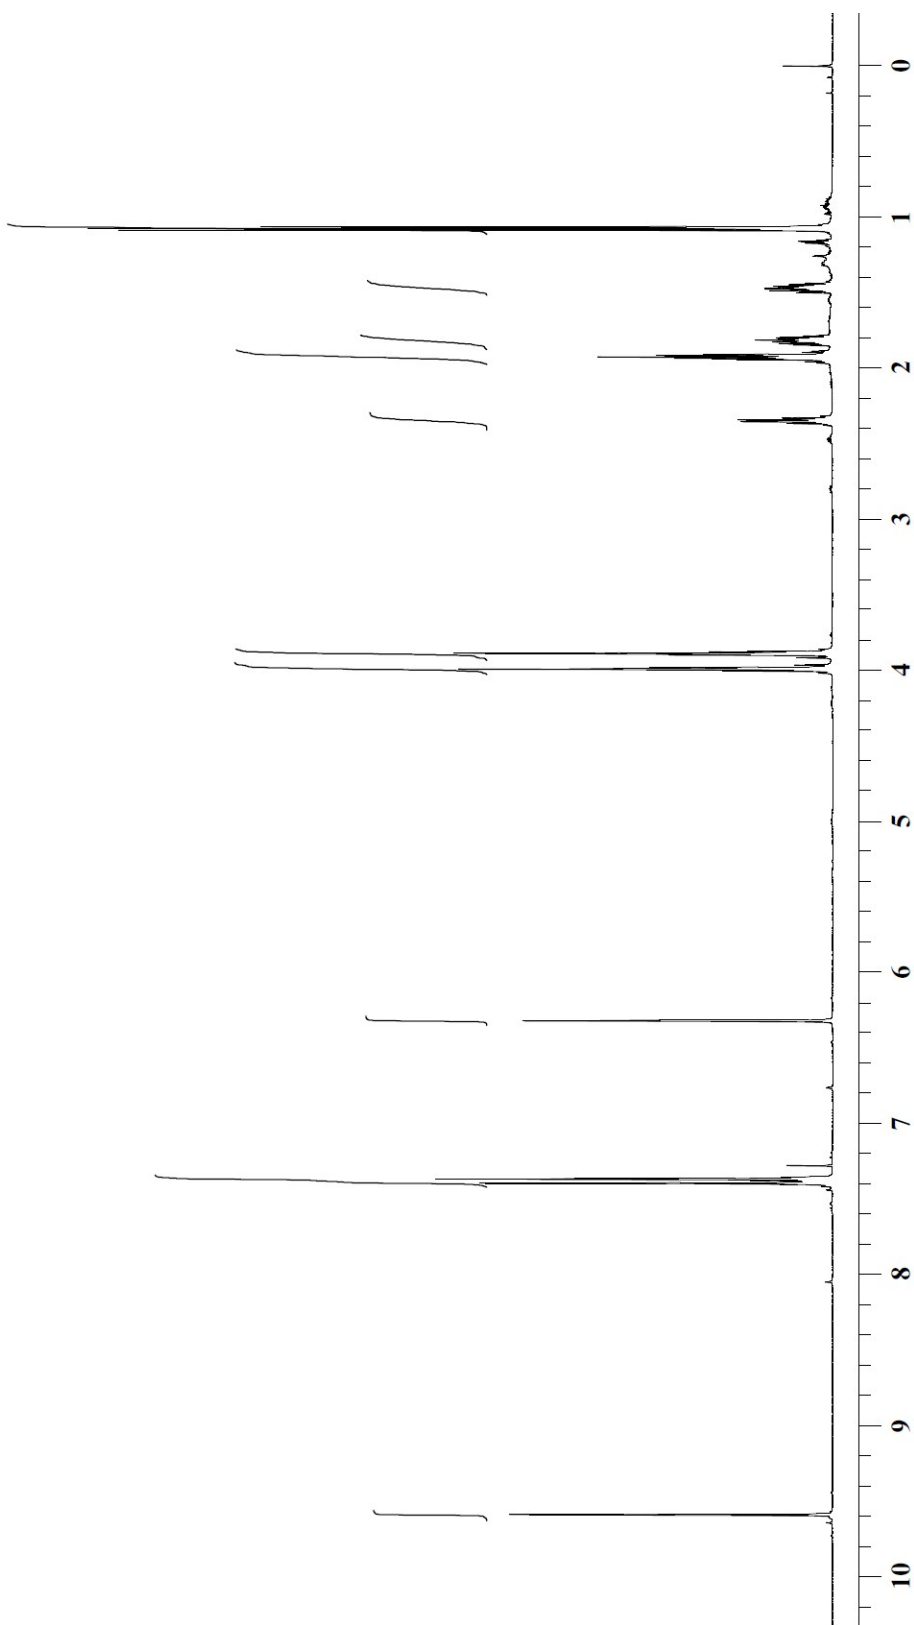

**<sup>13</sup>C NMR SPECTRUM OF COMPOUND 16**

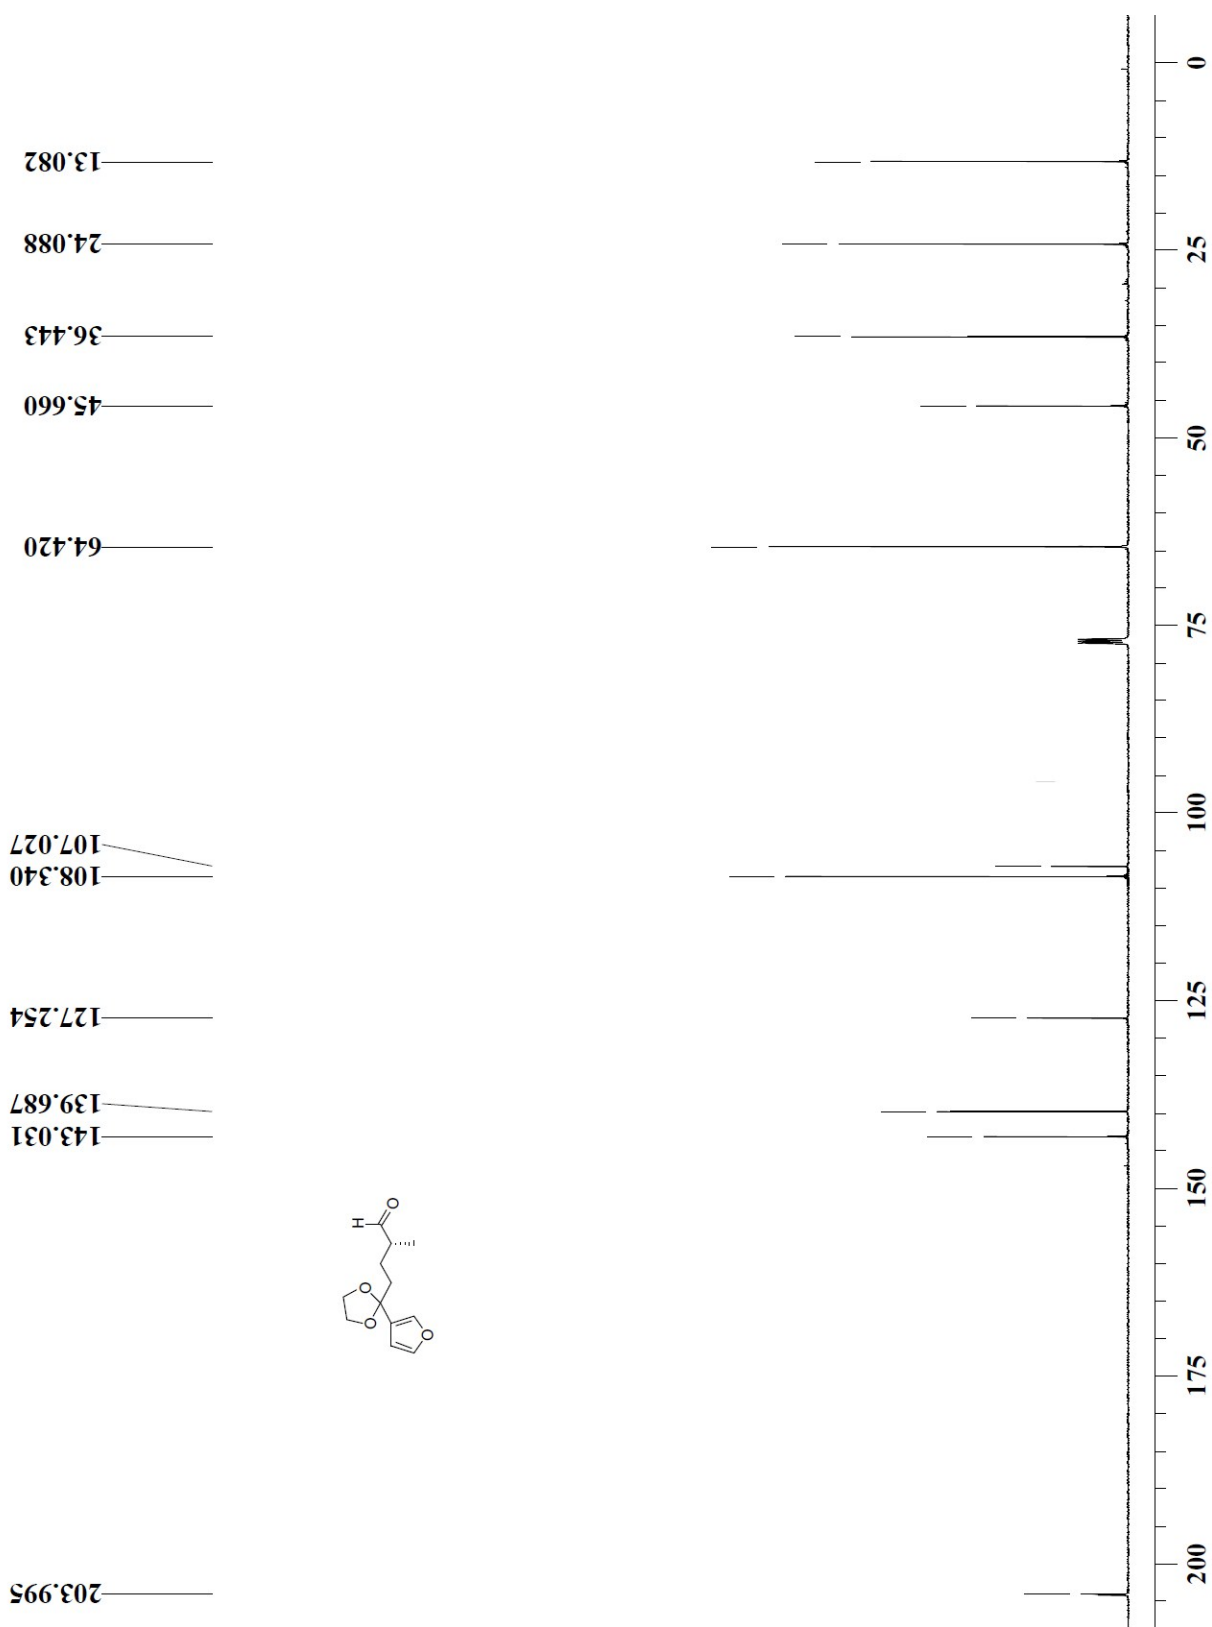

# <sup>1</sup>H NMR SPECTRUM OF COMPOUND 3

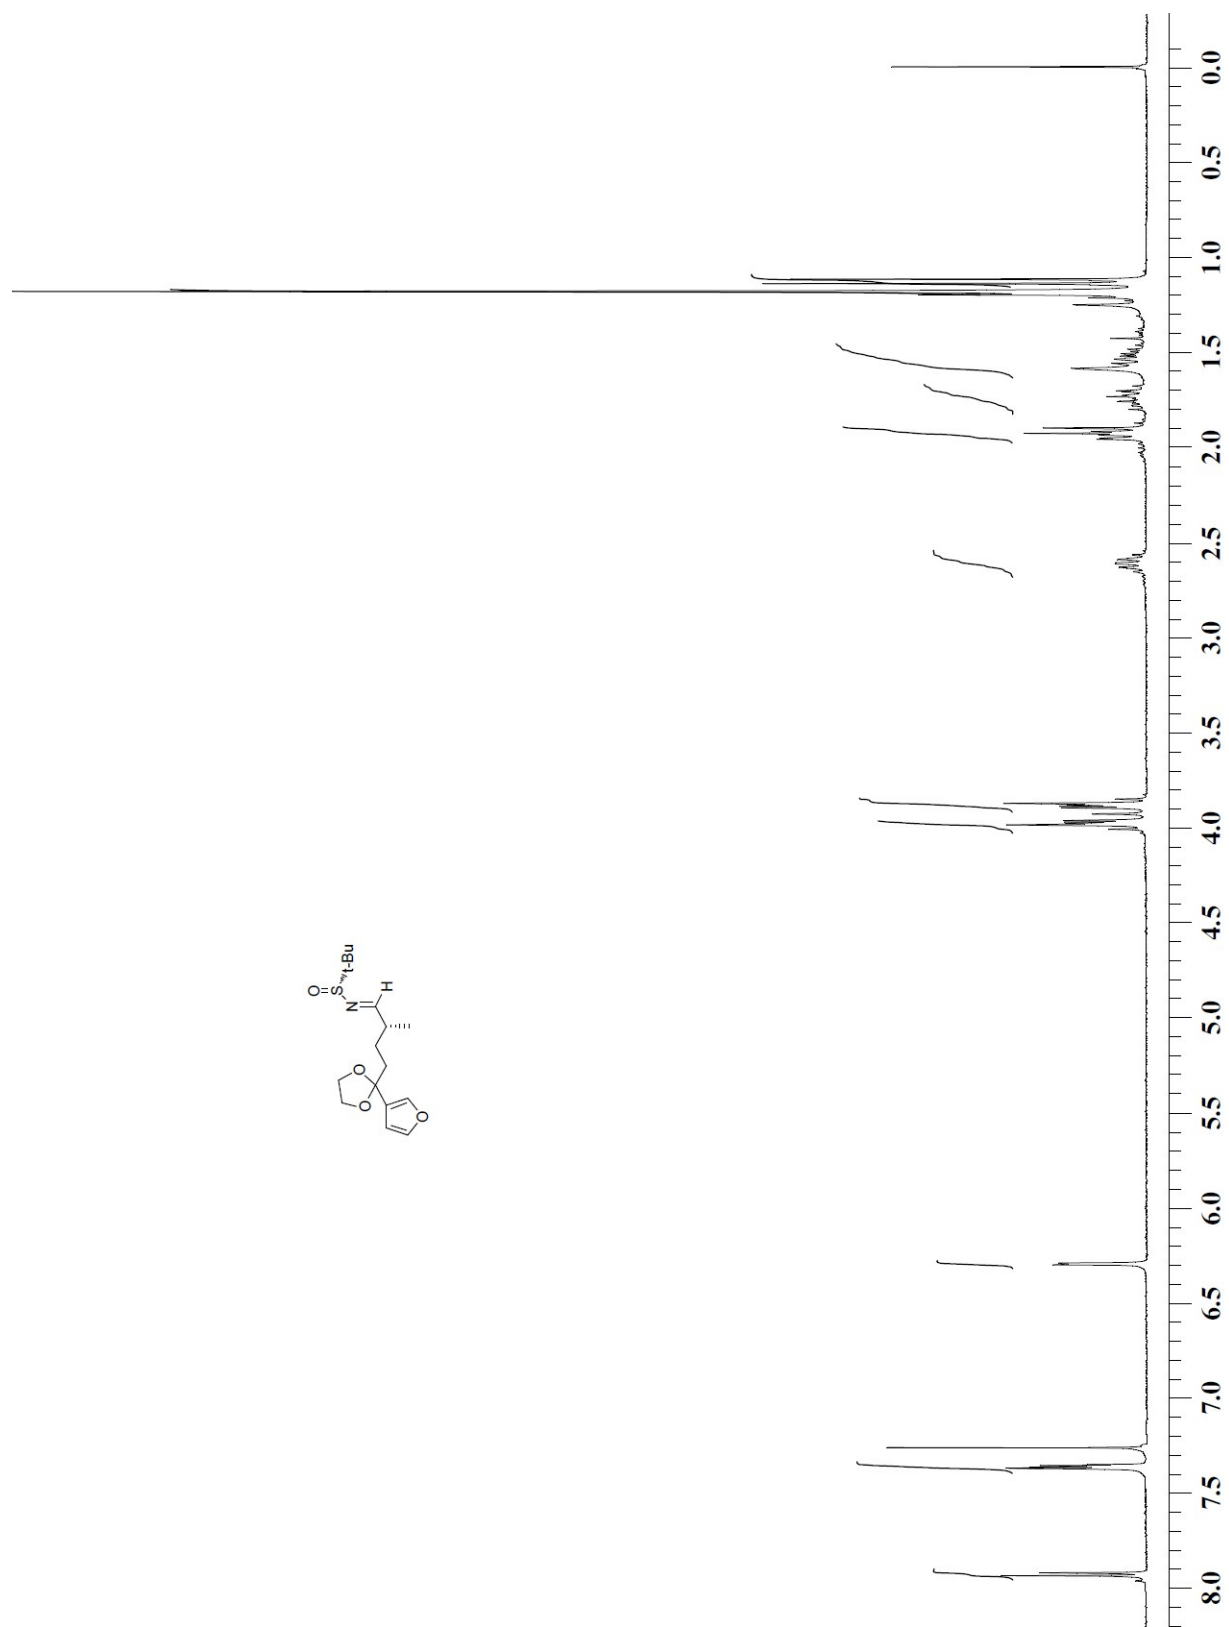

# <sup>13</sup>C NMR SPECTRUM OF COMPOUND 3

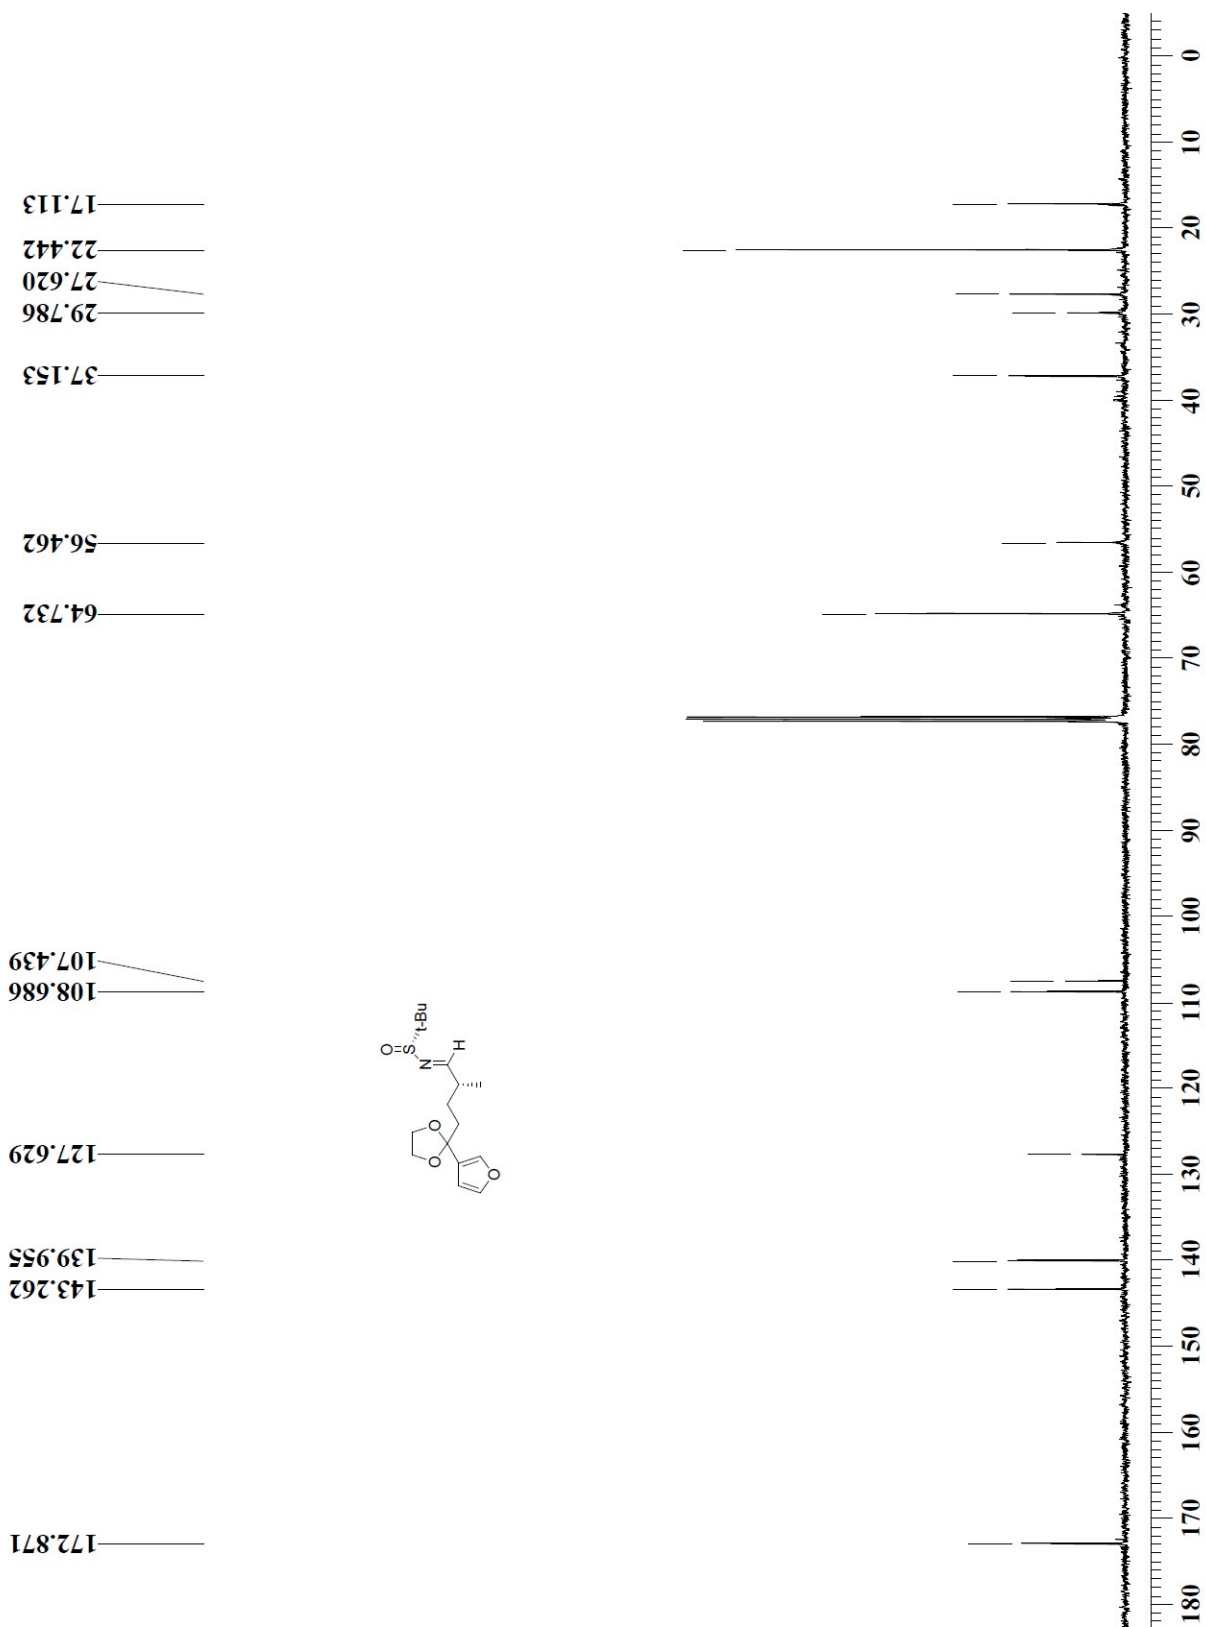

**<sup>1</sup>H NMR SPECTRUM OF COMPOUND 18**

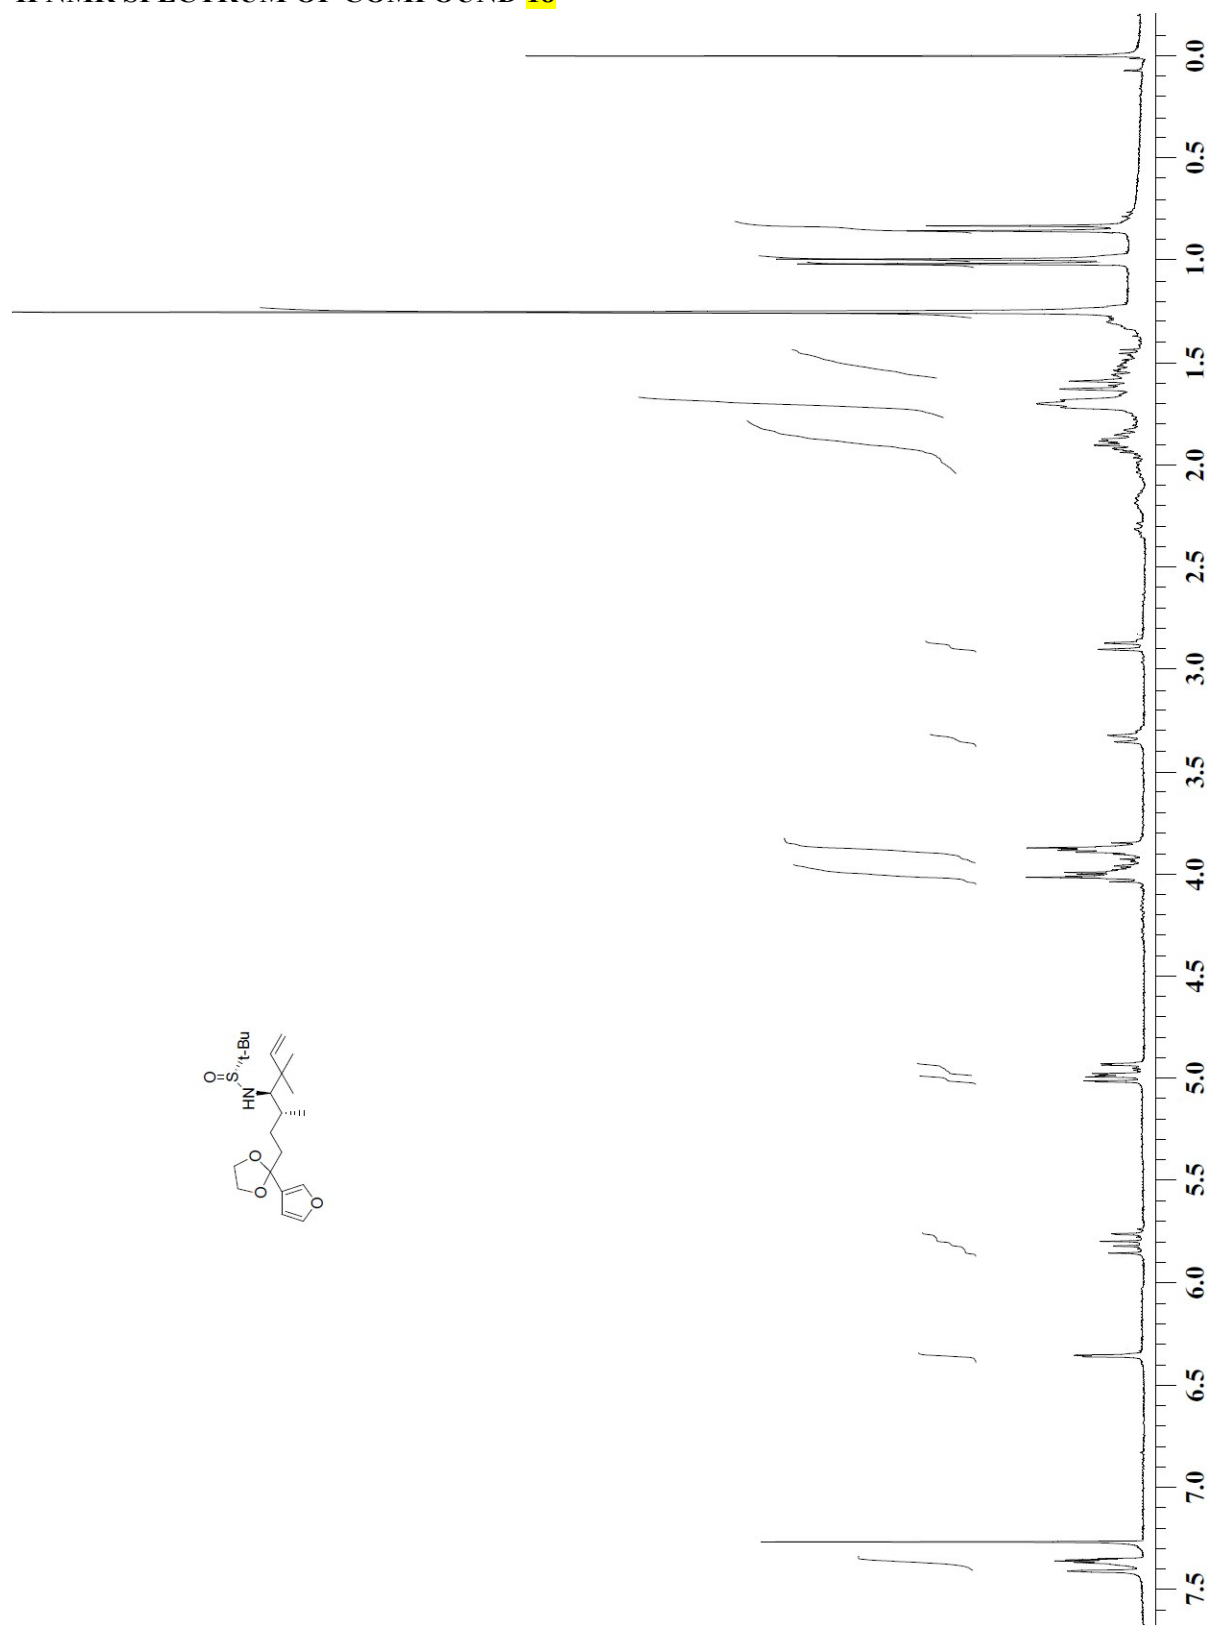

**<sup>1</sup>H NMR SPECTRUM OF COMPOUND 19**

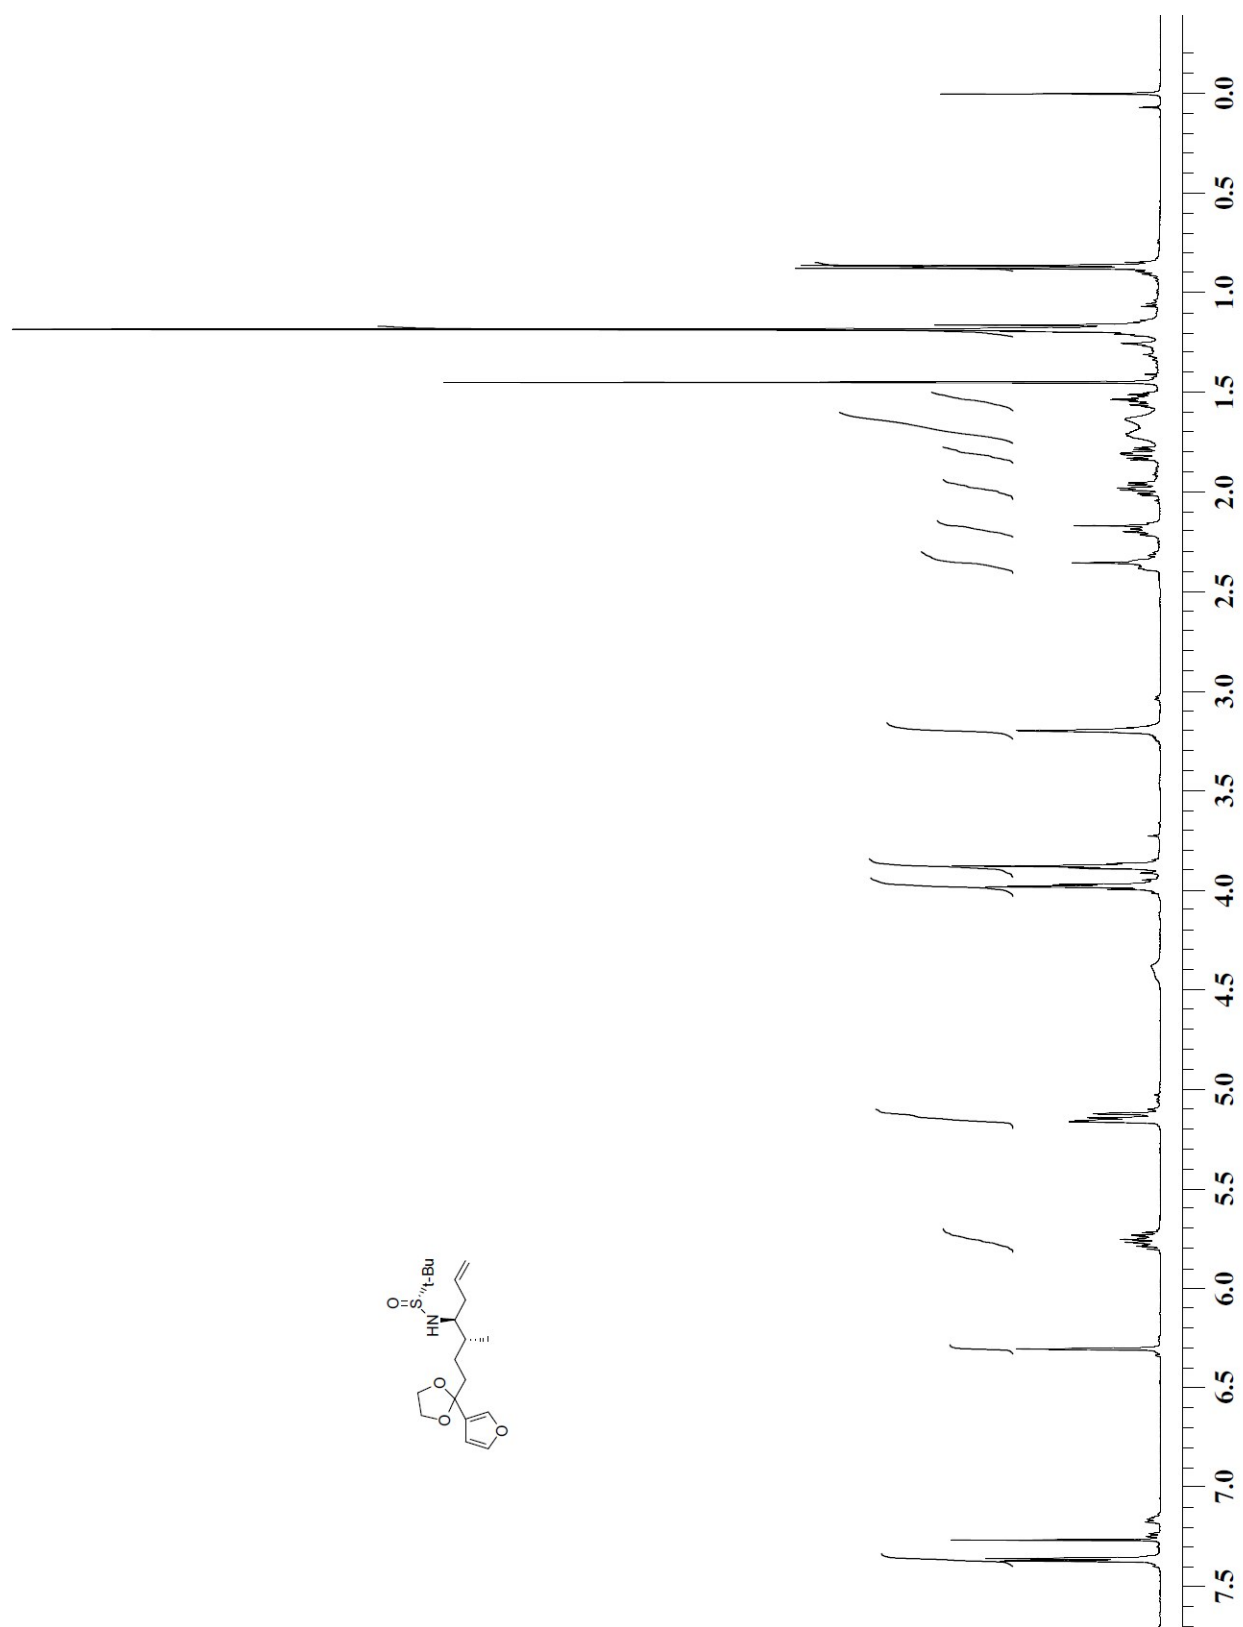



**<sup>13</sup>C NMR SPECTRUM OF COMPOUND 19**

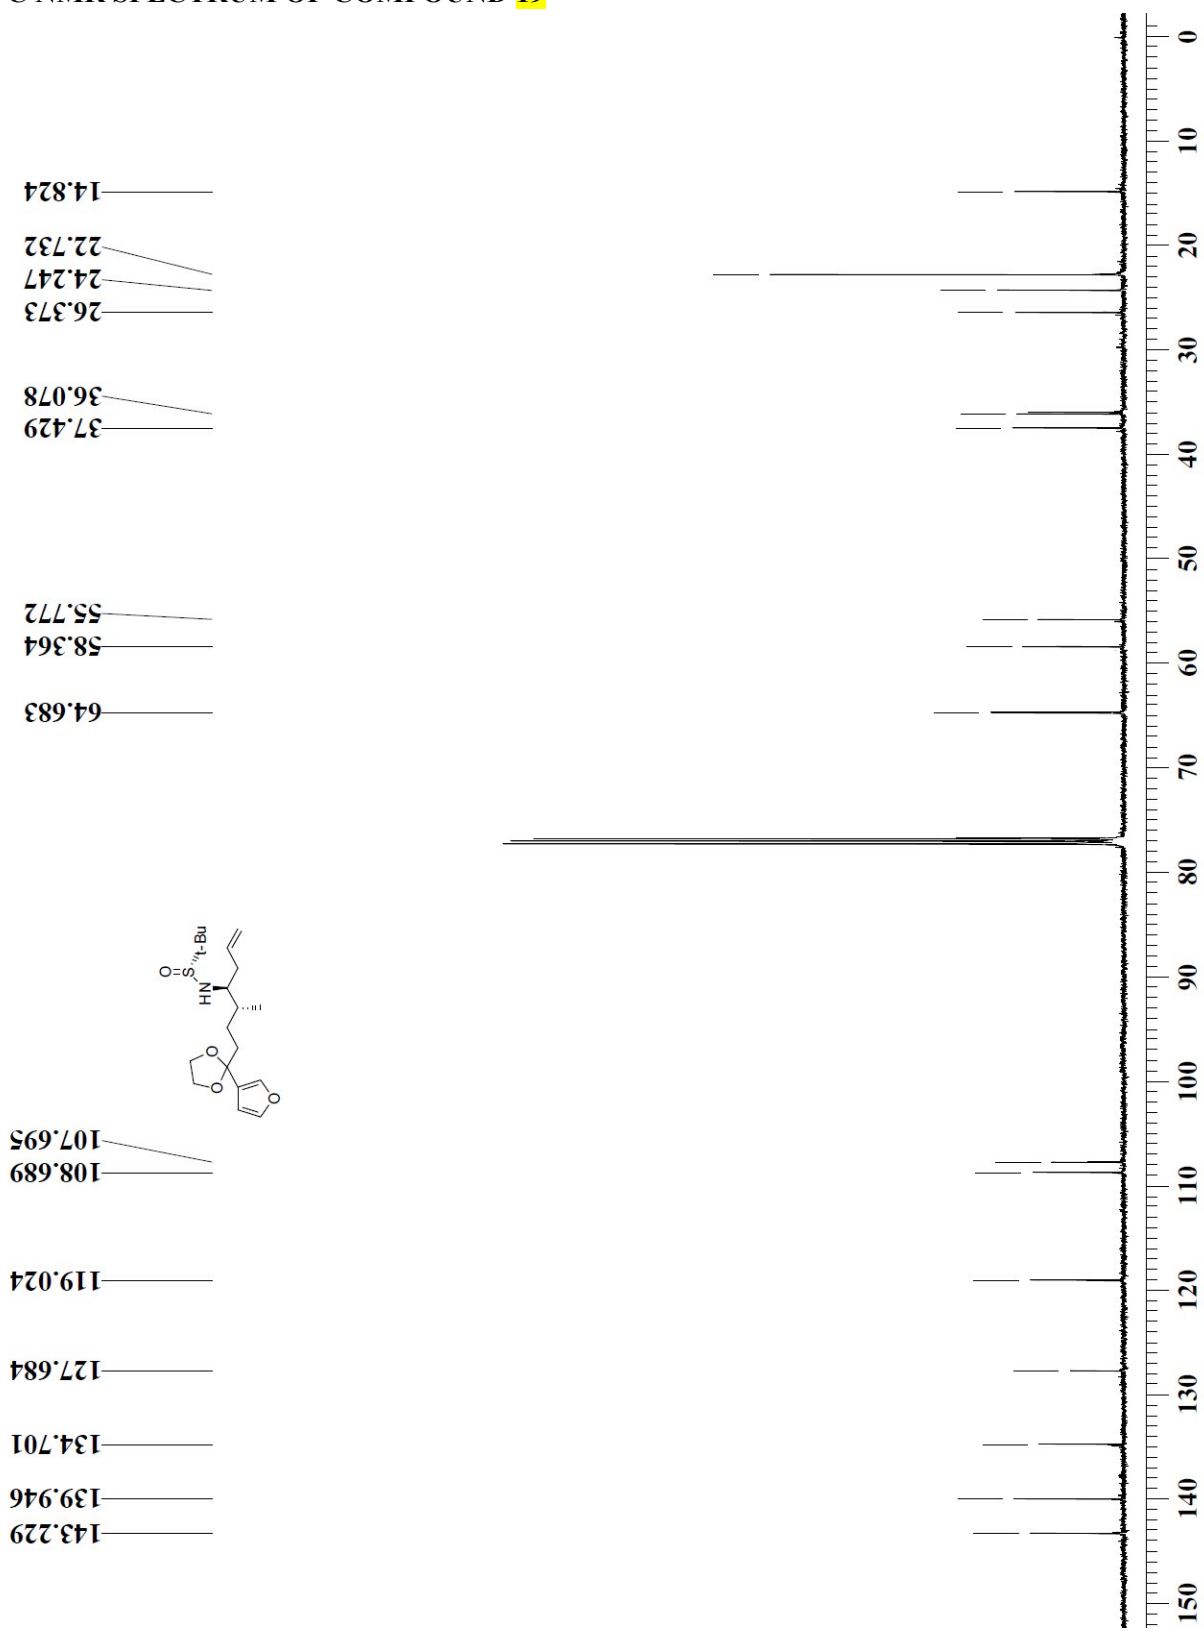

# <sup>1</sup>H NMR SPECTRUM OF COMPOUND 2

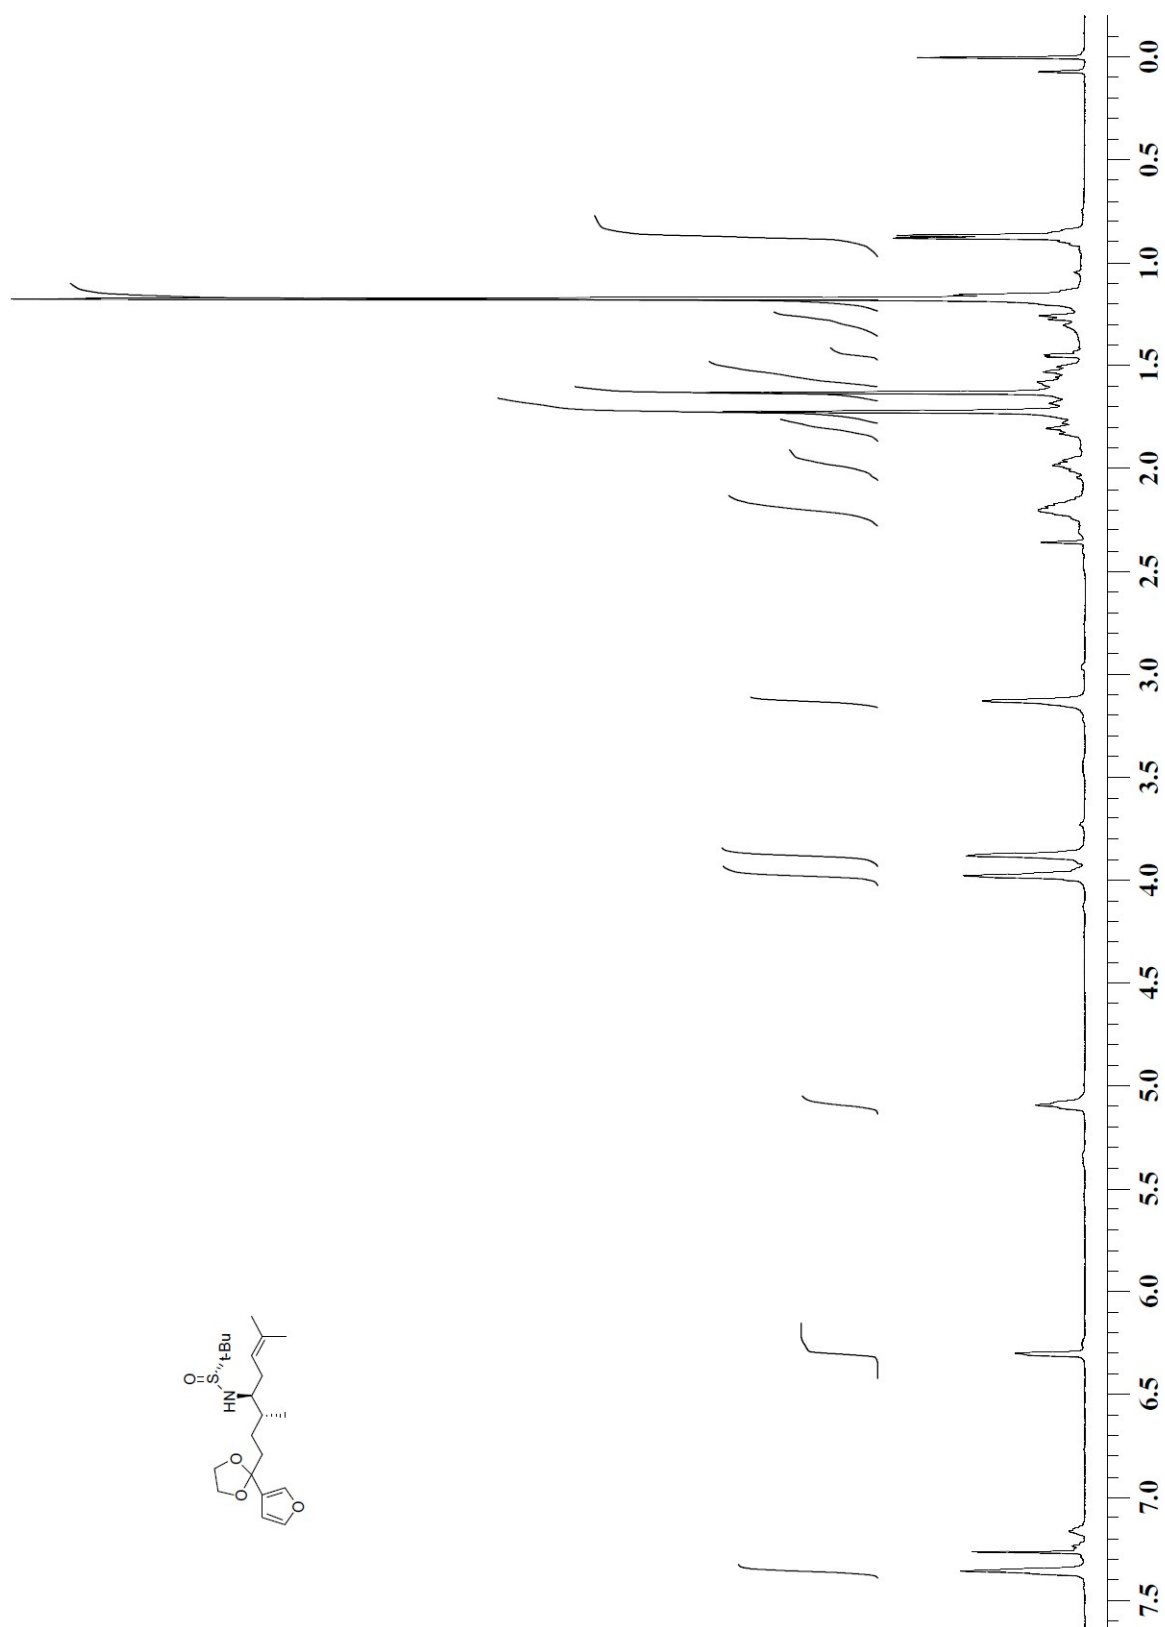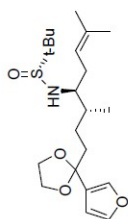

# <sup>13</sup>C NMR SPECTRUM OF COMPOUND 2

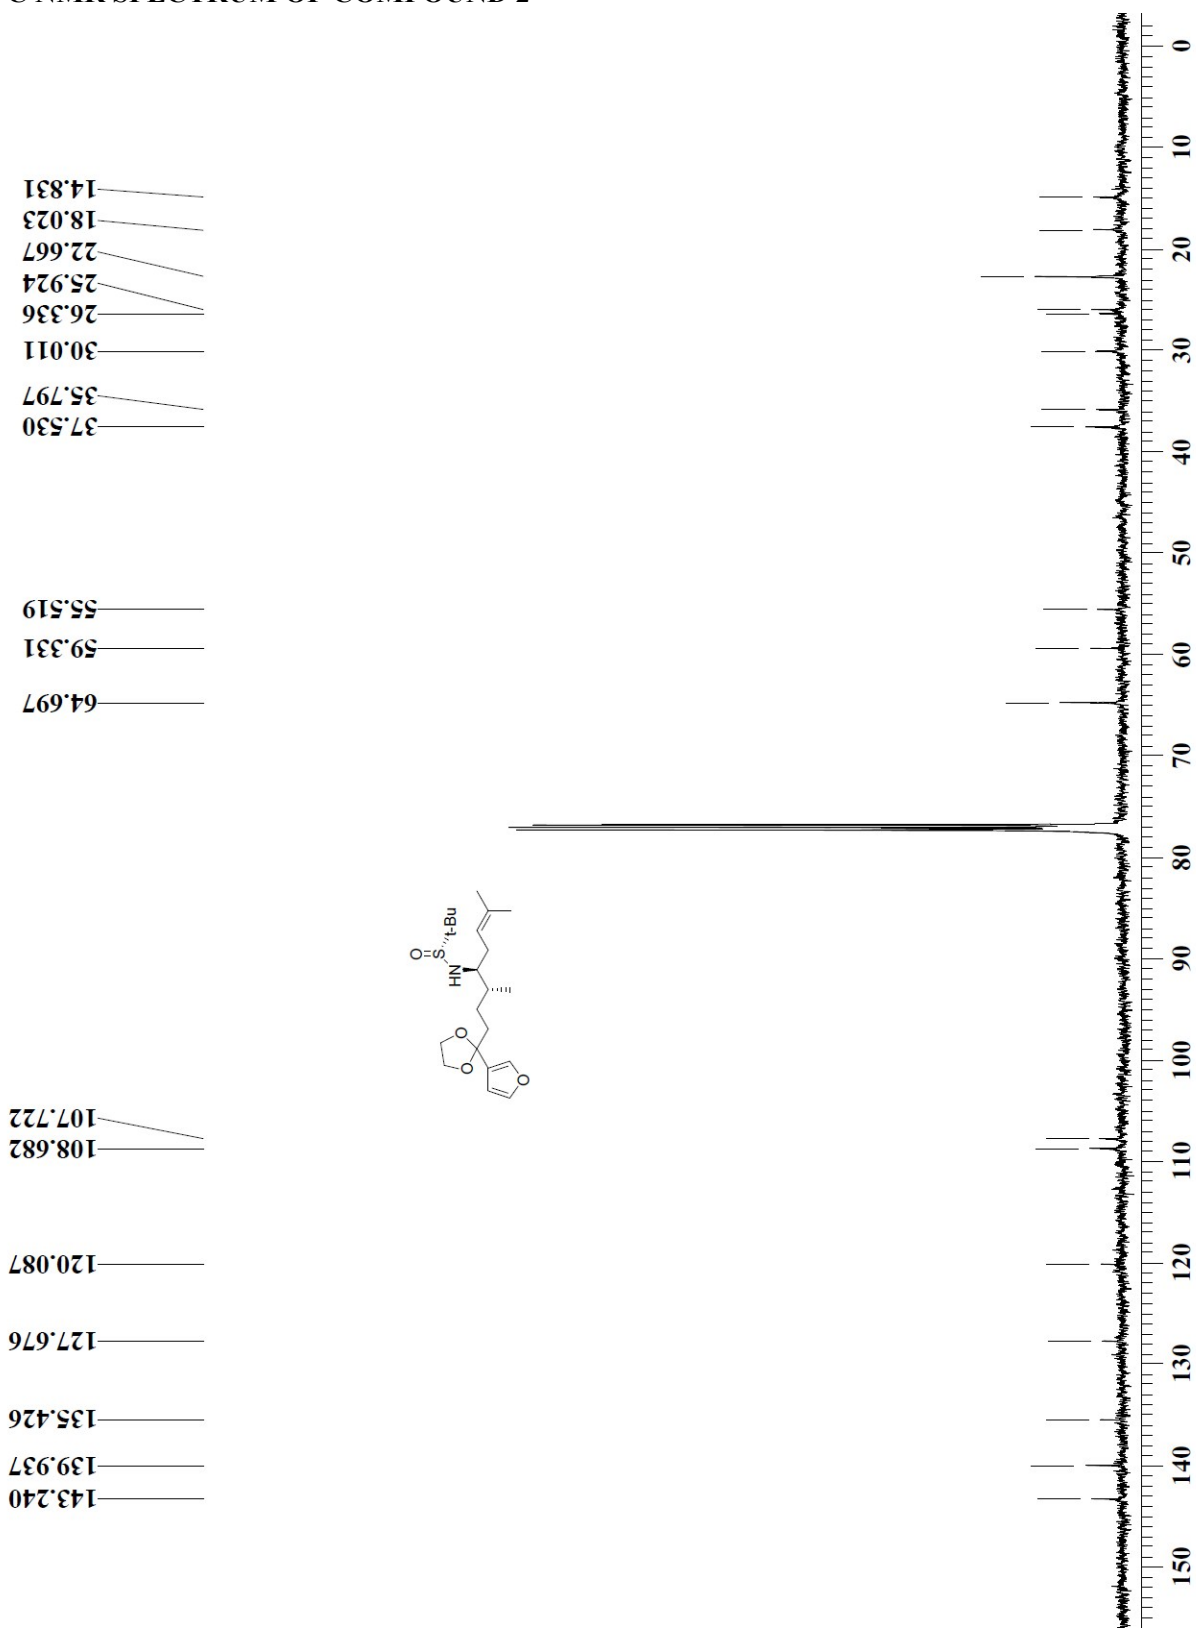

# <sup>1</sup>H NMR SPECTRUM OF NUPHARAMNE 1

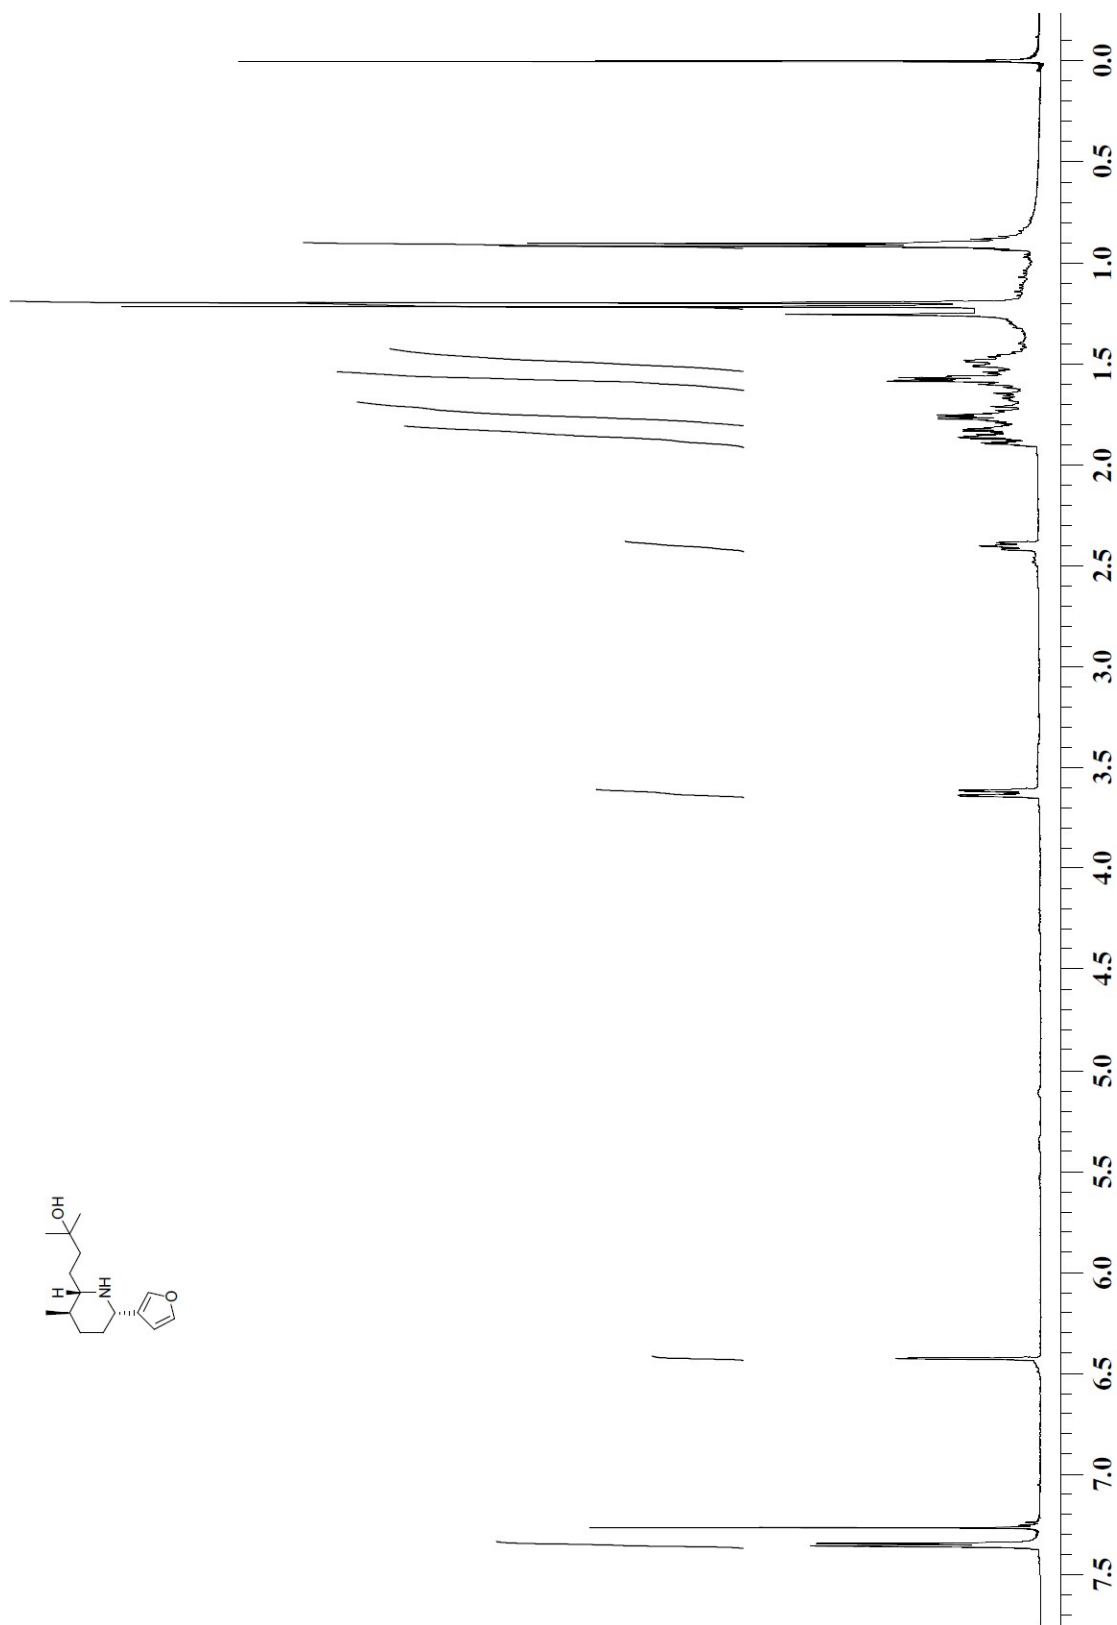

Supplement: c5ob01750e1.pdf [file c5ob01750e1.pdf]
